# Supplementary material for: Betti base derived P-stereogenic phosphine-diamidophosphite ligands with a single atom spacer and their application in asymmetric catalysis
Source: Royal Society of Chemistry journal article supplement (doi:10.1039/d1cy02017j), 2021-12-01
Supplement: d1cy02017j1.pdf [file d1cy02017j1.pdf]

---- Supporting Information ----

**Betti Base Derived P-Stereogenic Phosphine-Diamidophosphite Ligands with a Single  
Atom Spacer and their Application in Asymmetric Catalysis**

Soumyadeep Chakraborty,<sup>a</sup> Katharina Konieczny,<sup>a</sup> Bernd H. Müller,<sup>a</sup> Anke Spannenberg,<sup>a</sup> Paul C. J.  
Kamer,<sup>†a</sup> Johannes G. de Vries<sup>a\*</sup>

<sup>a</sup> Leibniz-Institut für Katalyse e.V.

Albert-Einstein-Straße 29a, 18059 Rostock, Germany

[Johannes.deVries@catalysis.de](mailto:Johannes.deVries@catalysis.de)

***Table of Contents***

|                                                                         |    |
|-------------------------------------------------------------------------|----|
| ▪ General procedure for the synthesis of acetamidoacrylates .....       | 2  |
| ▪ General procedure for the upscaling .....                             | 2  |
| ▪ NMR Spectra of the ligands.....                                       | 3  |
| ▪ HRMS of the ligands .....                                             | 13 |
| ▪ NMR of the hydrogenated products .....                                | 17 |
| ▪ HPLC Traces for enantiomeric excess determination of the product..... | 24 |
| ▪ X-ray Crystallographic data.....                                      | 30 |
| ▪ Reference.....                                                        | 31 |

## ▪ General procedure for the synthesis of acetamidoacrylates

The acetamidoacrylate derivatives were synthesized following the literature procedure from the corresponding aromatic aldehyde and N-acetyl glycine.<sup>1</sup> The analytical data match with the previously reported data.

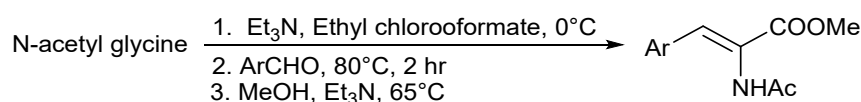

*Figure S 1* General procedure for the synthesis of dehydroamino acid derivatives

## ▪ General procedure for the upscaling

The asymmetric hydrogenation upscaling experiments were performed in a stainless-steel autoclave charged with an insert suitable for up to 5 reaction vessels (10 mL each) with teflon mini stirring bars. In a typical experiment, a reaction vessel is charged with  $[\text{Rh}(\text{cod})_2]\text{BF}_4$  (1 mol%) and ligand (M/L=1/1.1) and stirred for 10-15 mins in the appropriate solvent. The desired substrates (3.0 mmol) were added to the reaction vessel maintaining the inert atmosphere and the vessels were placed in high pressure autoclave. The autoclave was purged two times with nitrogen and three times with hydrogen. Finally, it was pressurized at the 10 bar of  $\text{H}_2$  pressure at  $25^\circ\text{C}$  for 14 hrs. After the desired reaction time, the autoclave was depressurized, and the reaction mixture was diluted with EtOAc and filtered through a short pad of silica. The conversion was determined by GC and GC-MS measurement and the enantiomeric excess was measured by chiral HPLC.

## NMR Spectra of the ligands

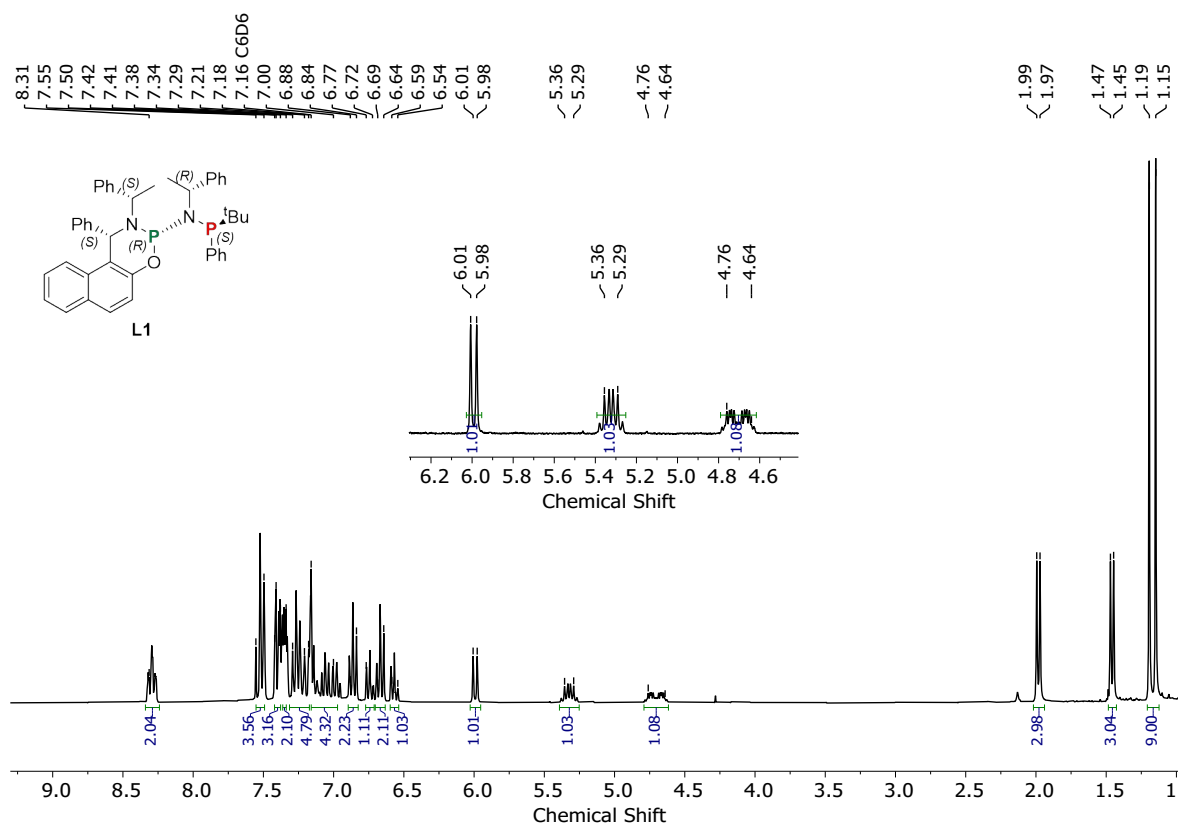

Figure S 2 <sup>1</sup>H NMR of (S,S,R<sub>p</sub>,R,S)<sub>p</sub>- L1

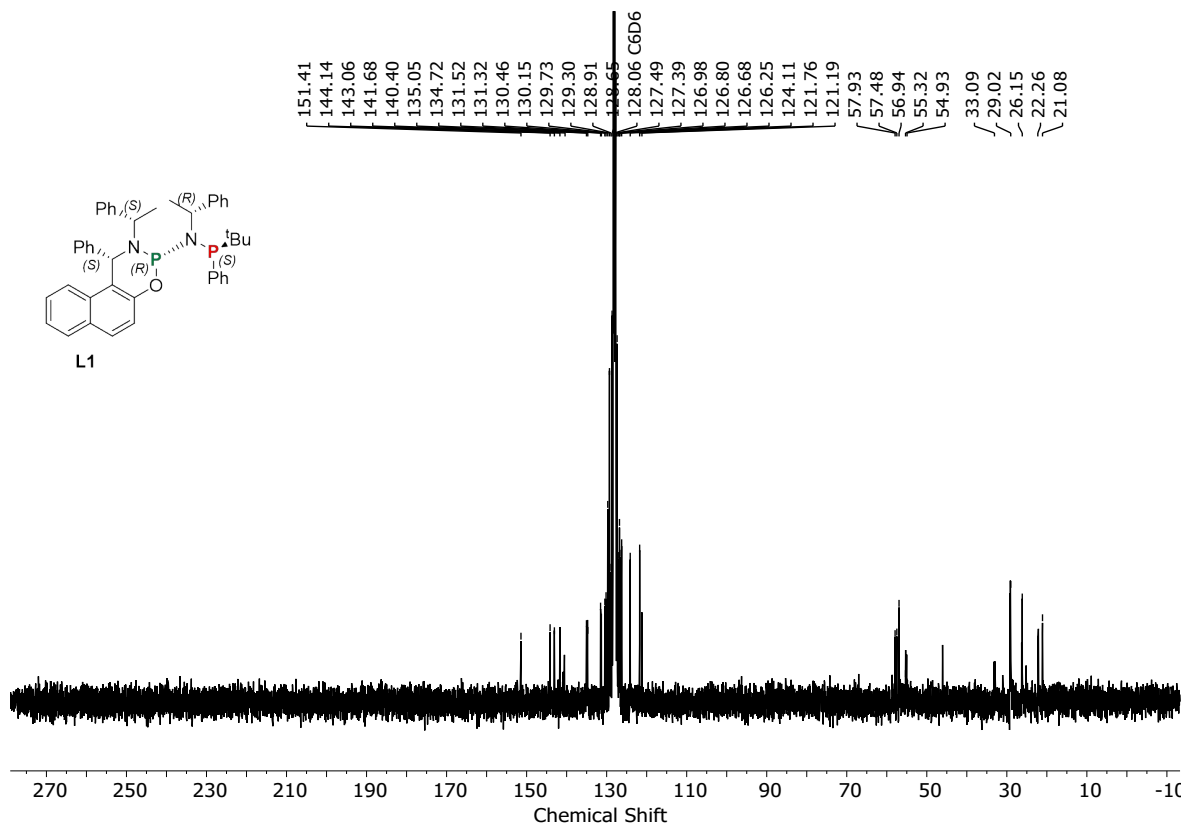

Figure S 3 L1 <sup>13</sup>C NMR of (S,S,R<sub>p</sub>,R,S)<sub>p</sub>- L1

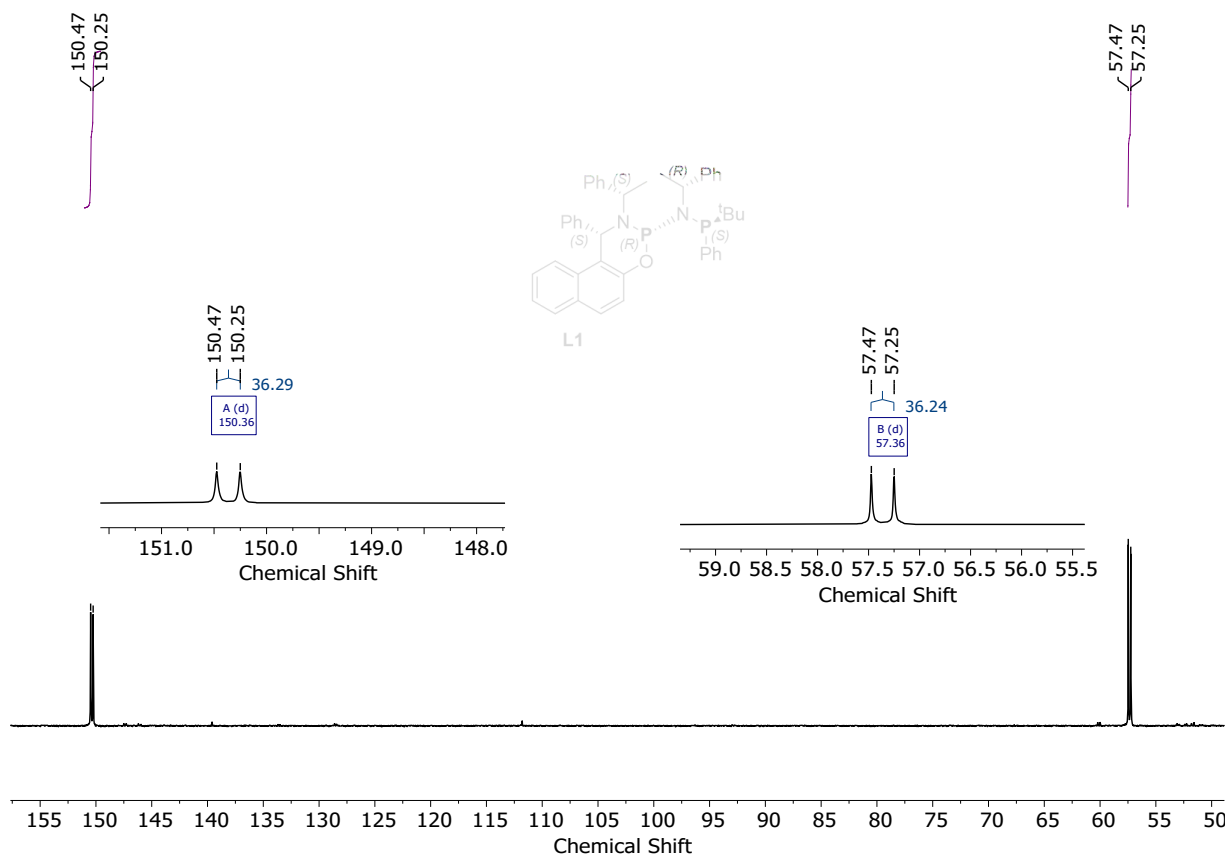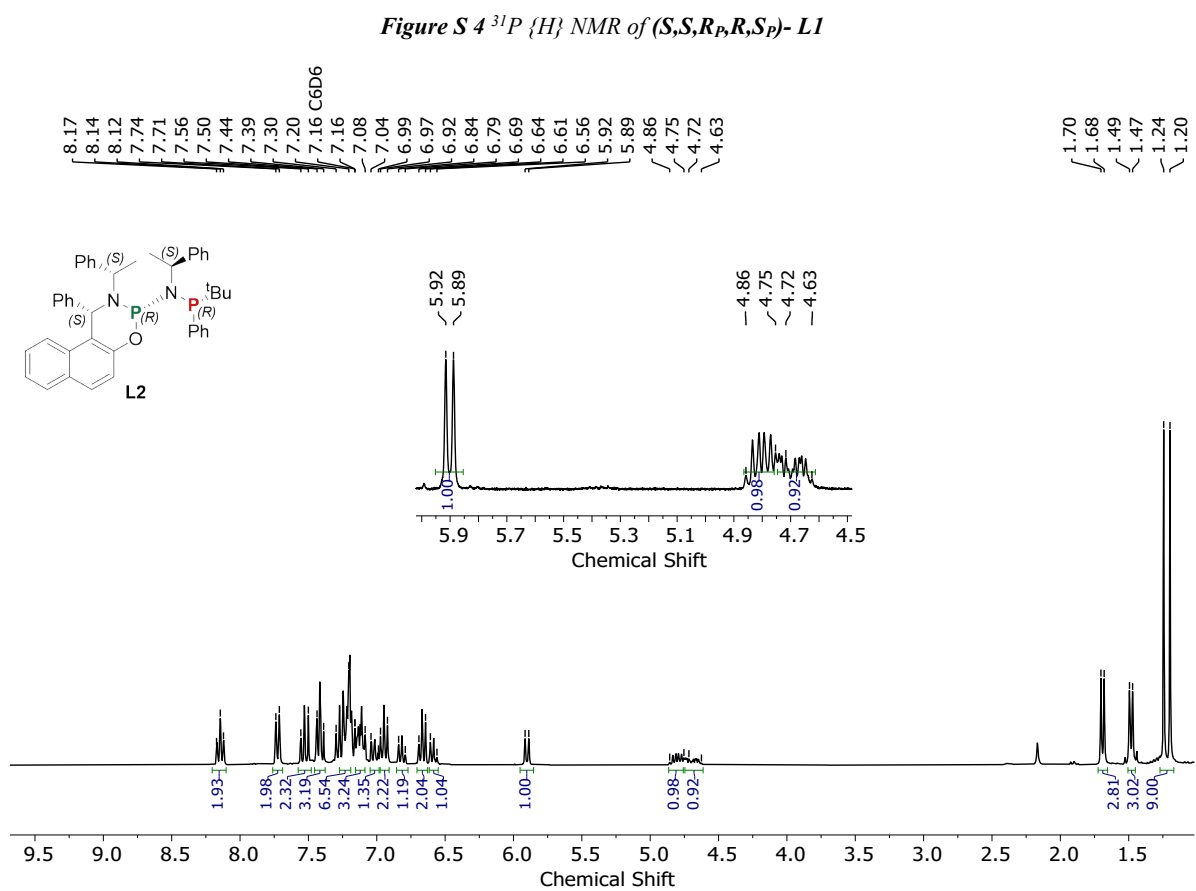

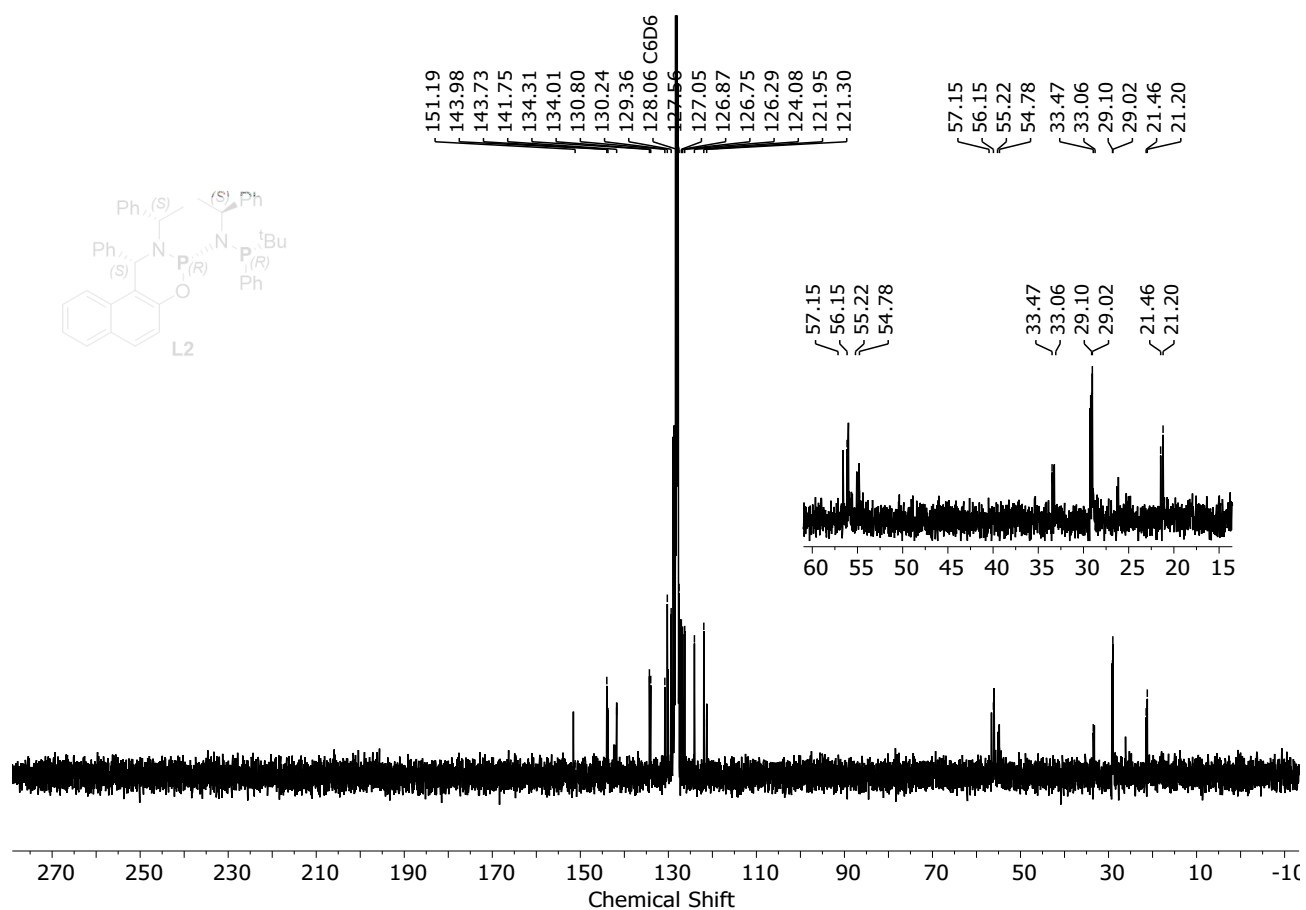

Figure S 6  $^{13}\text{C}$  NMR of  $(S,S,R_p,S,R_p)$ -L2

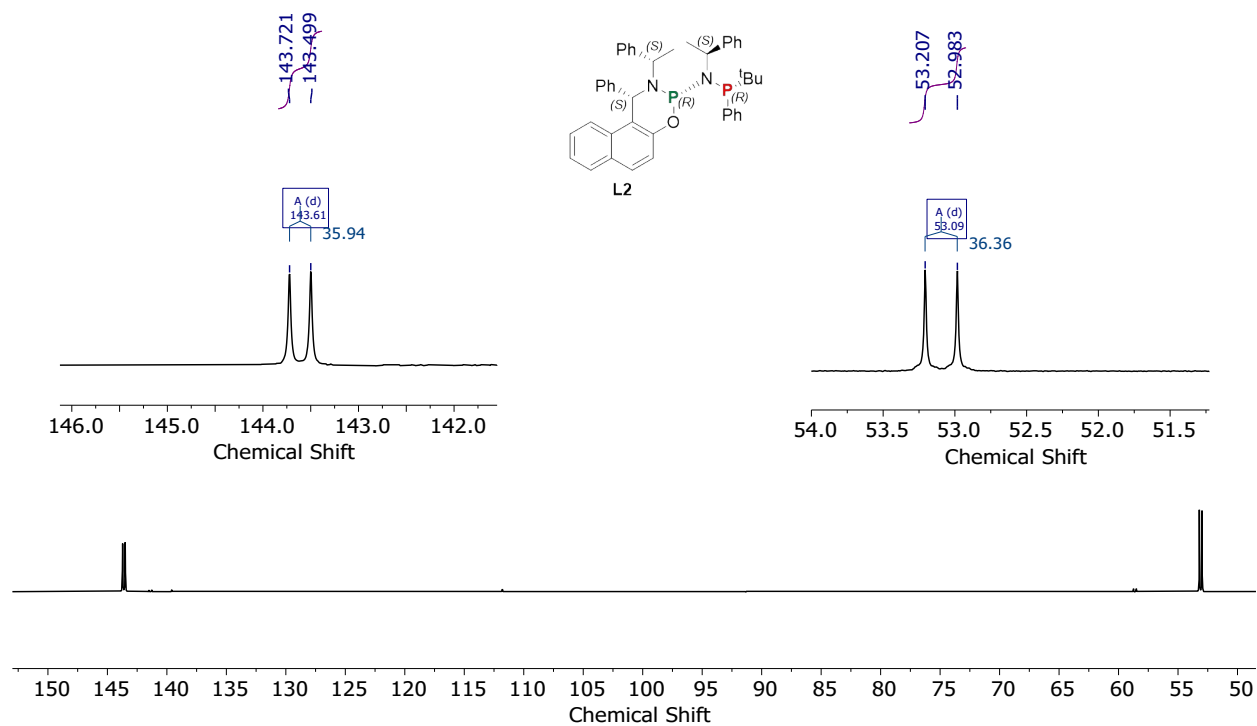

Figure S 7  $^{31}\text{P}$   $\{^1\text{H}\}$  NMR of  $(S,S,R_p,S,R_p)$ -L2

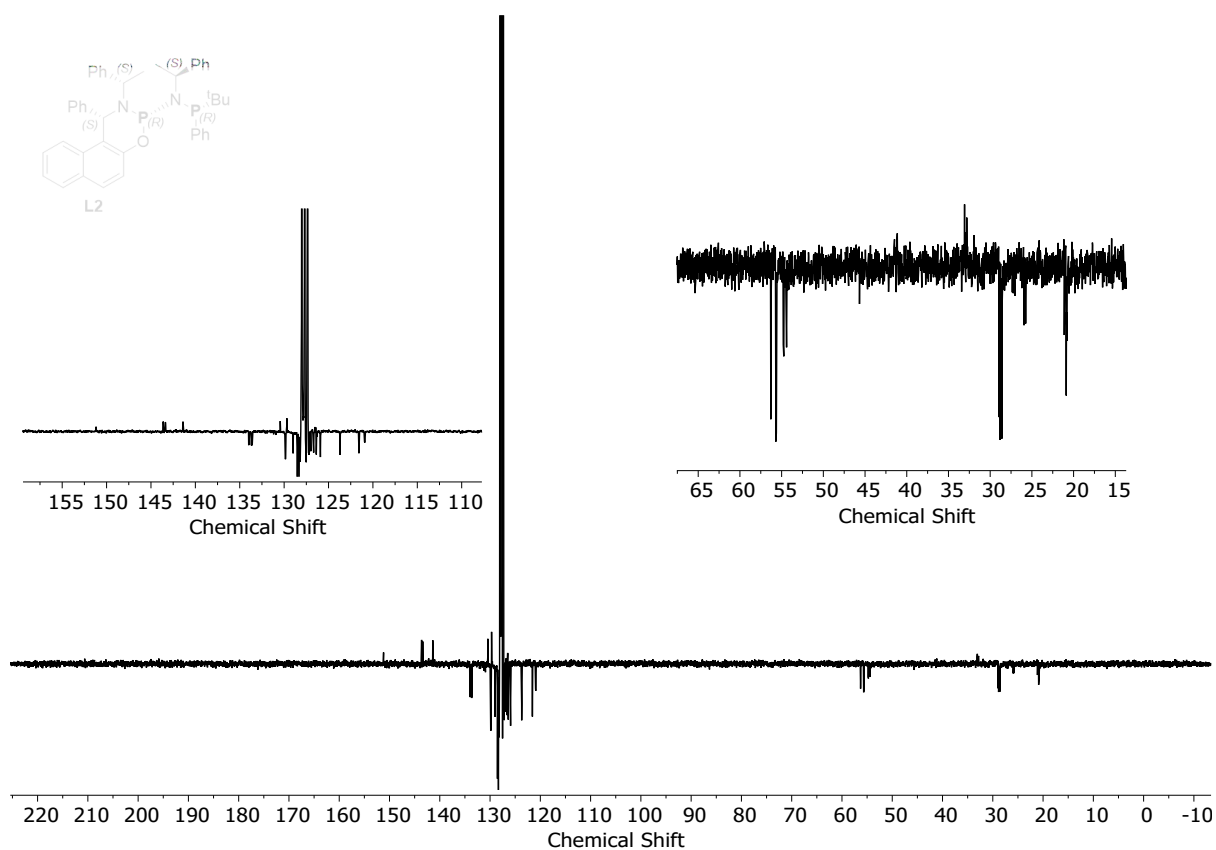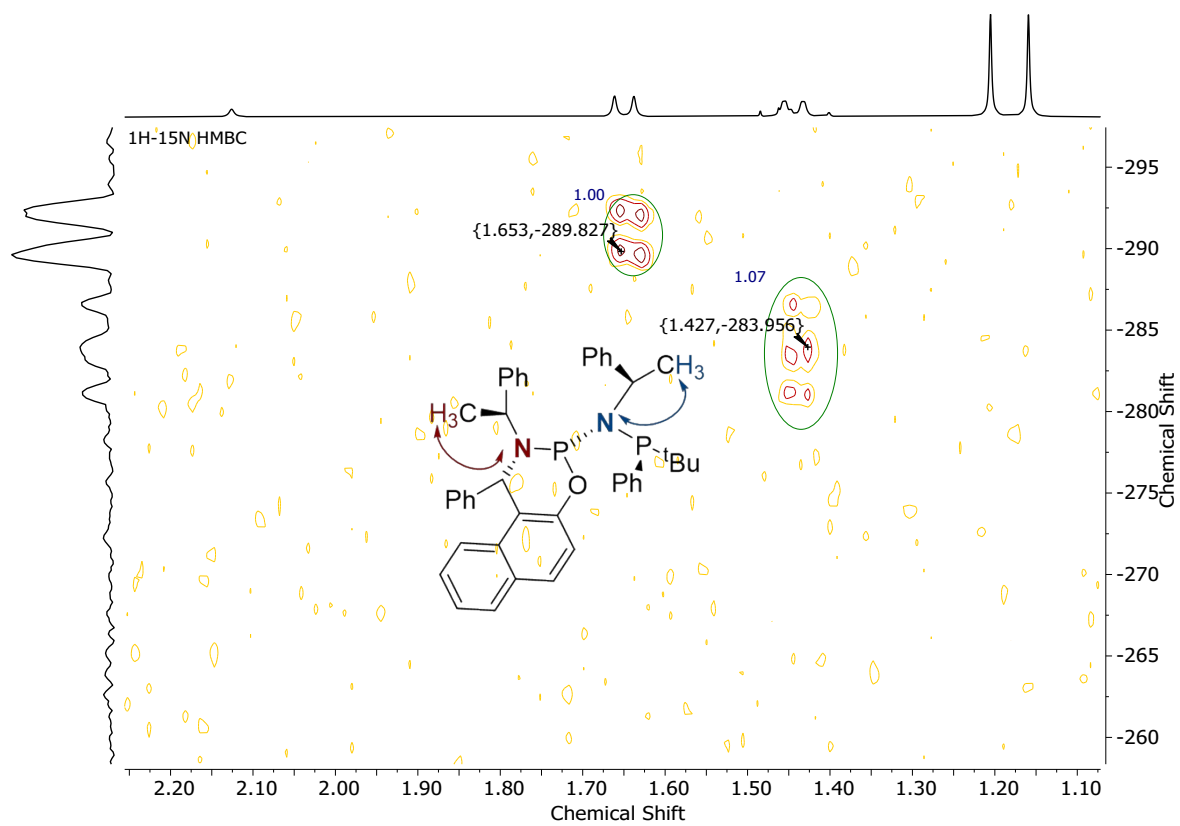

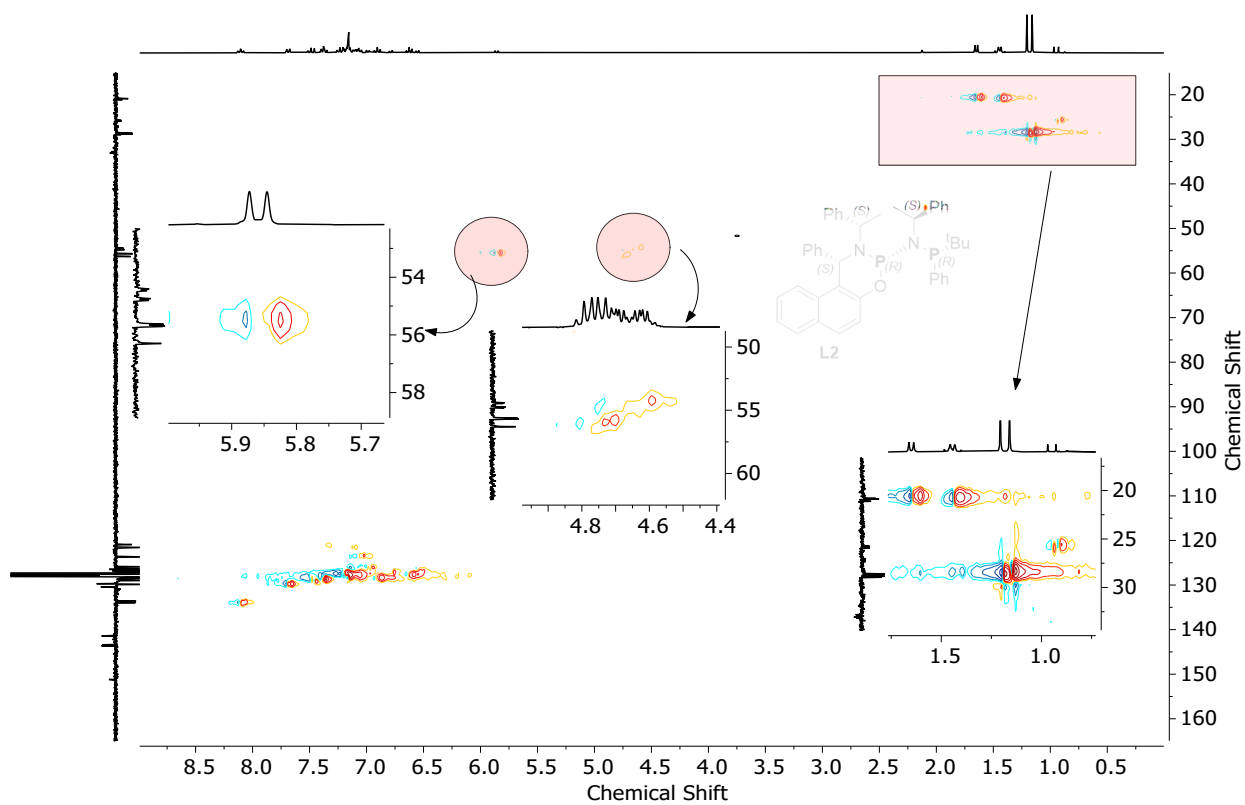

Figure S 10  $^1\text{H}$ - $^{13}\text{C}$ -HSQC of  $(S,S,R_p,S,R_p)$ -L2

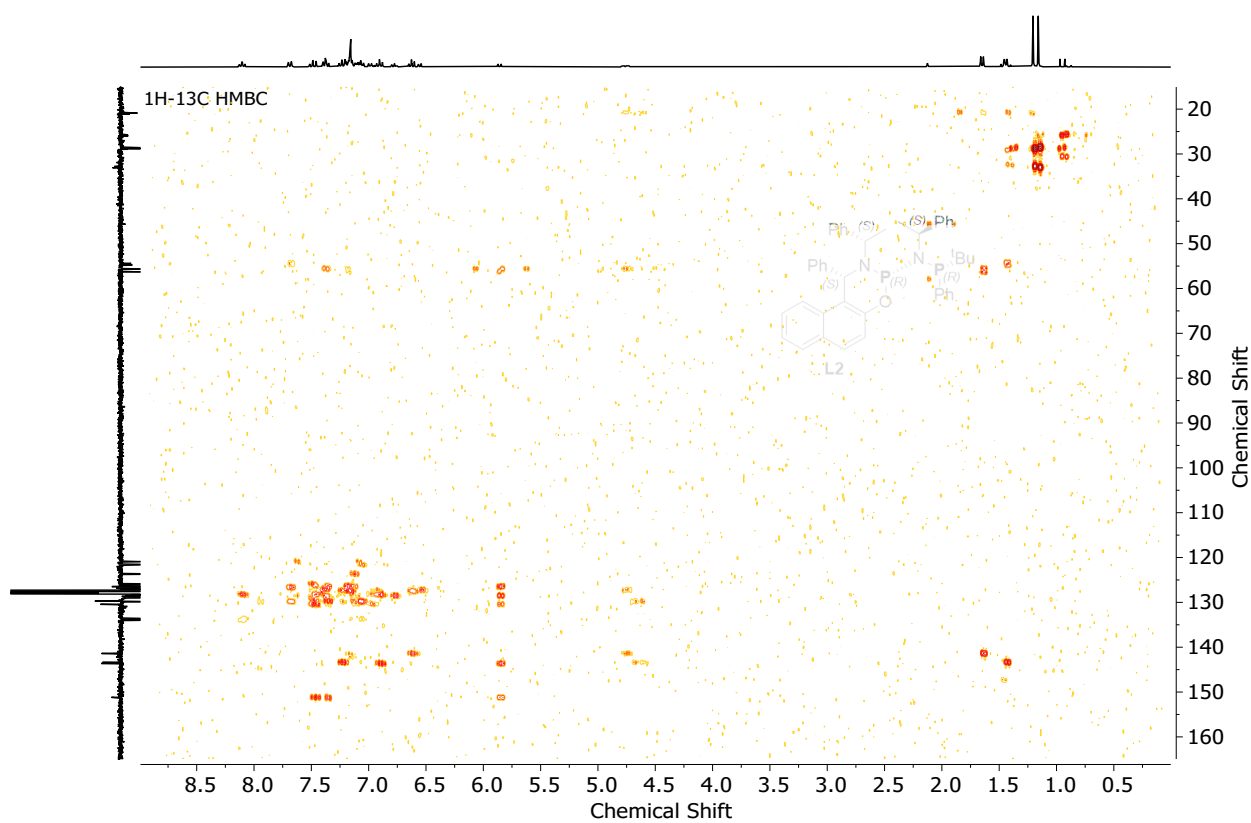

Figure S 11  $^1\text{H}$ - $^{13}\text{C}$ -HMBC of  $(S,S,R_p,S,R_p)$ -L2

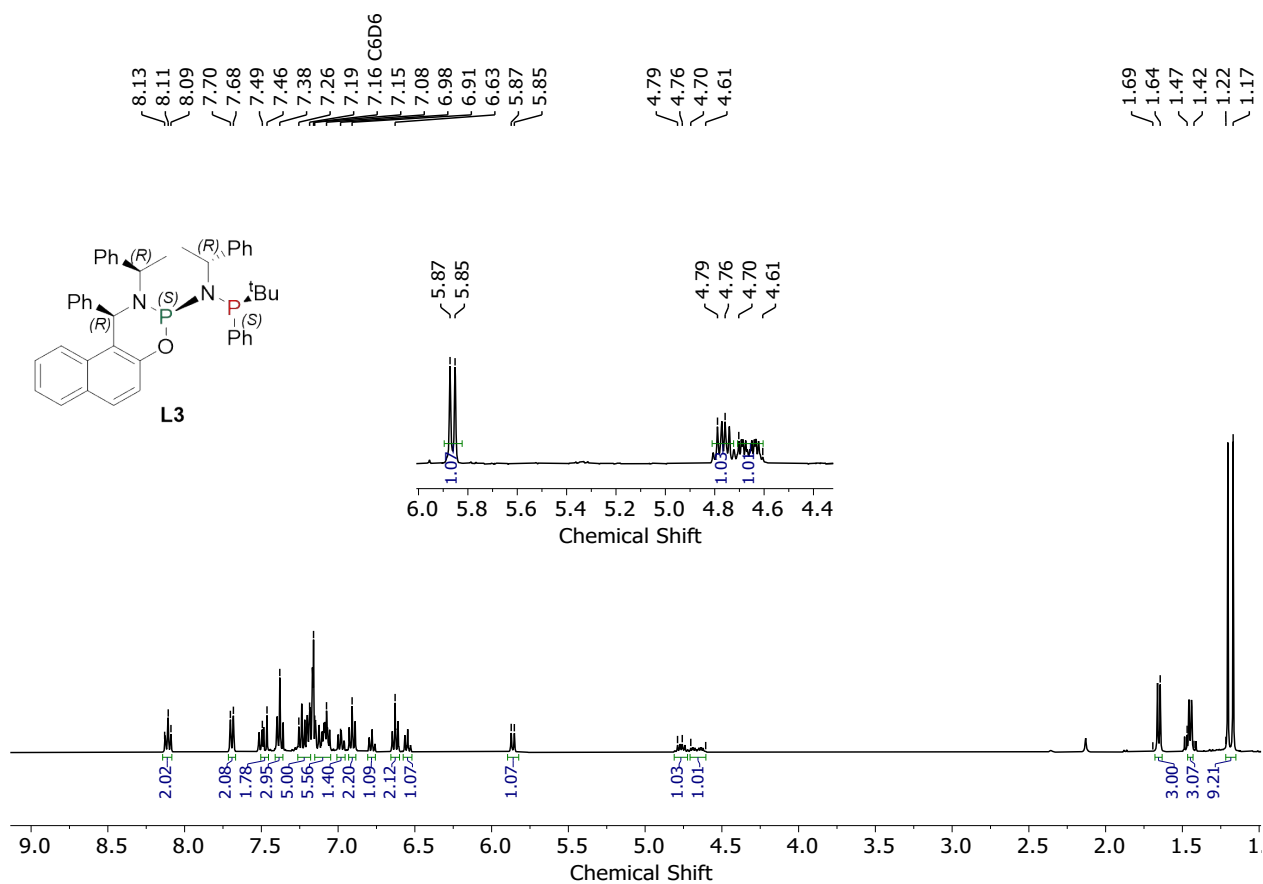

Figure S 12  $^1\text{H}$  NMR of  $(R,R,S_P,R,S_P)$ - L3

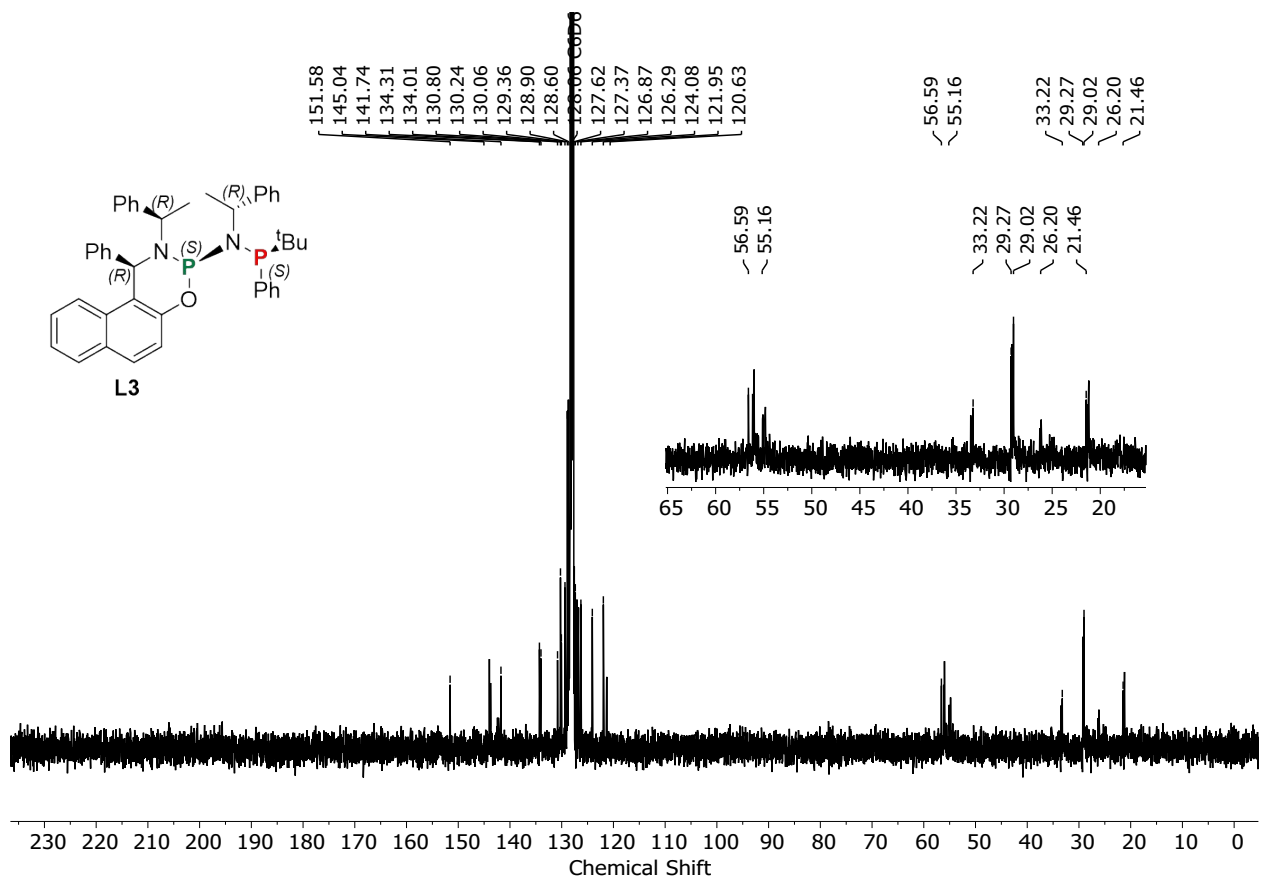

Figure S 13  $^{13}\text{C}$  NMR of  $(R,R,S_P,R,S_P)$ - L3



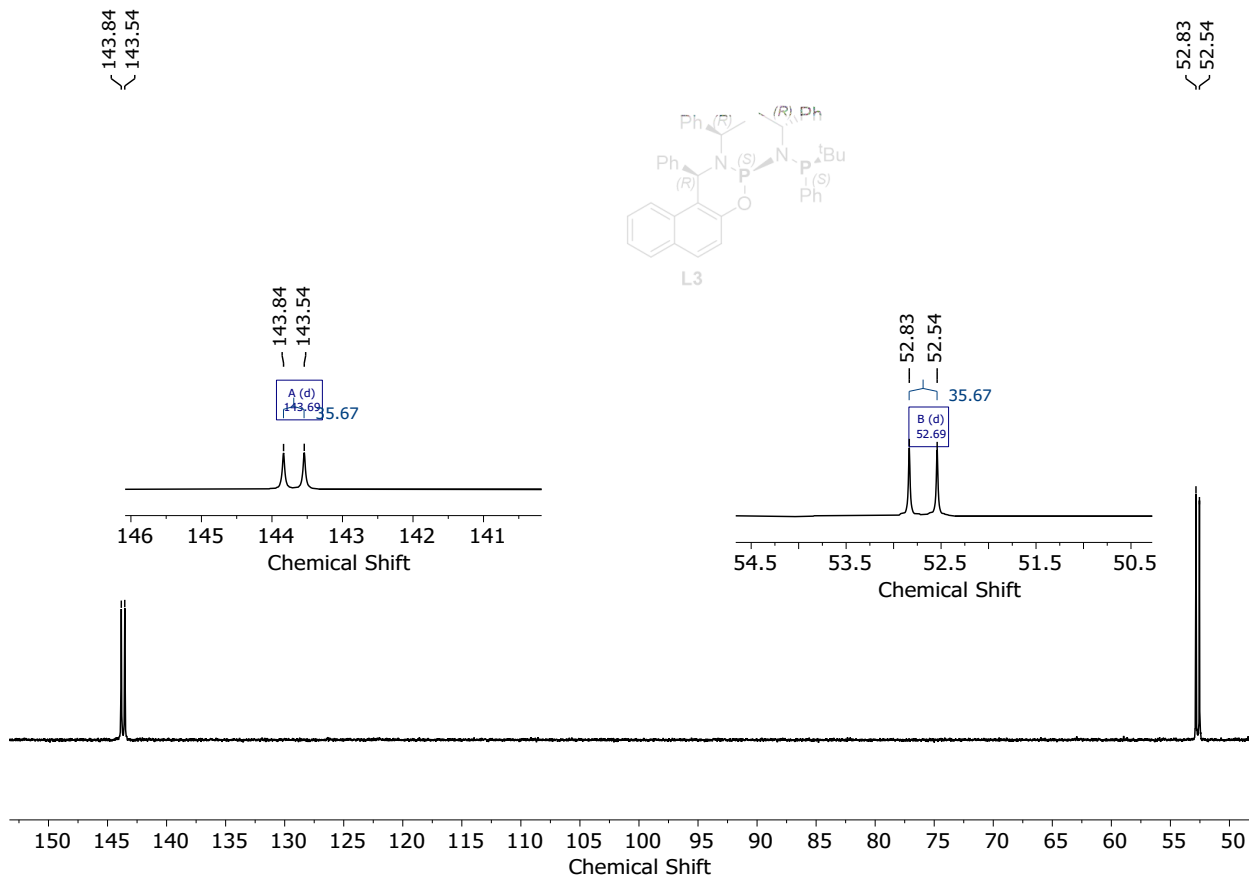

**Figure S 14**  $^{31}\text{P}$   $\{^1\text{H}\}$  NMR of  $(R,R,S_P,R,S_P)$ - **L3**

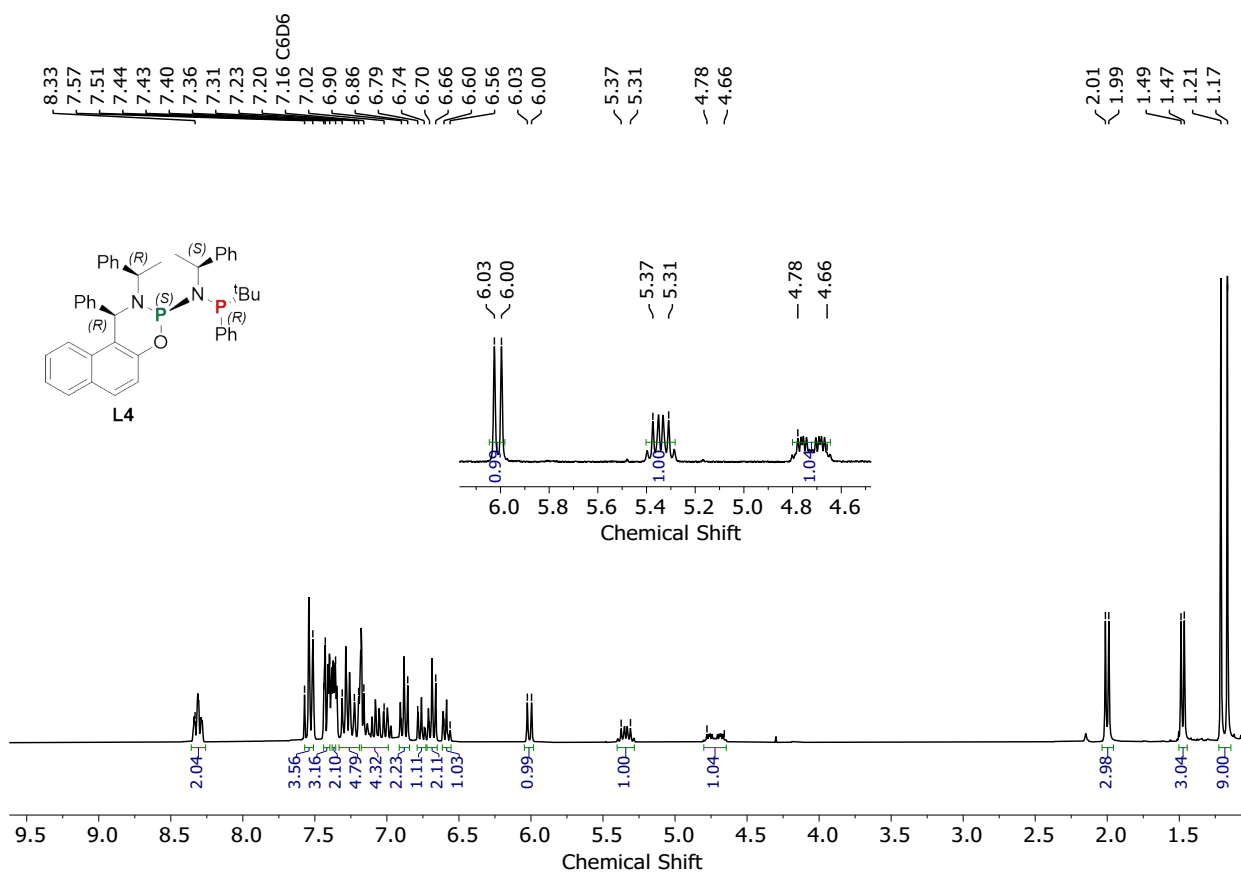

**Figure S 15**  $^1\text{H}$  NMR of  $(R,R,S_P,S,R_P)$ - **L4**

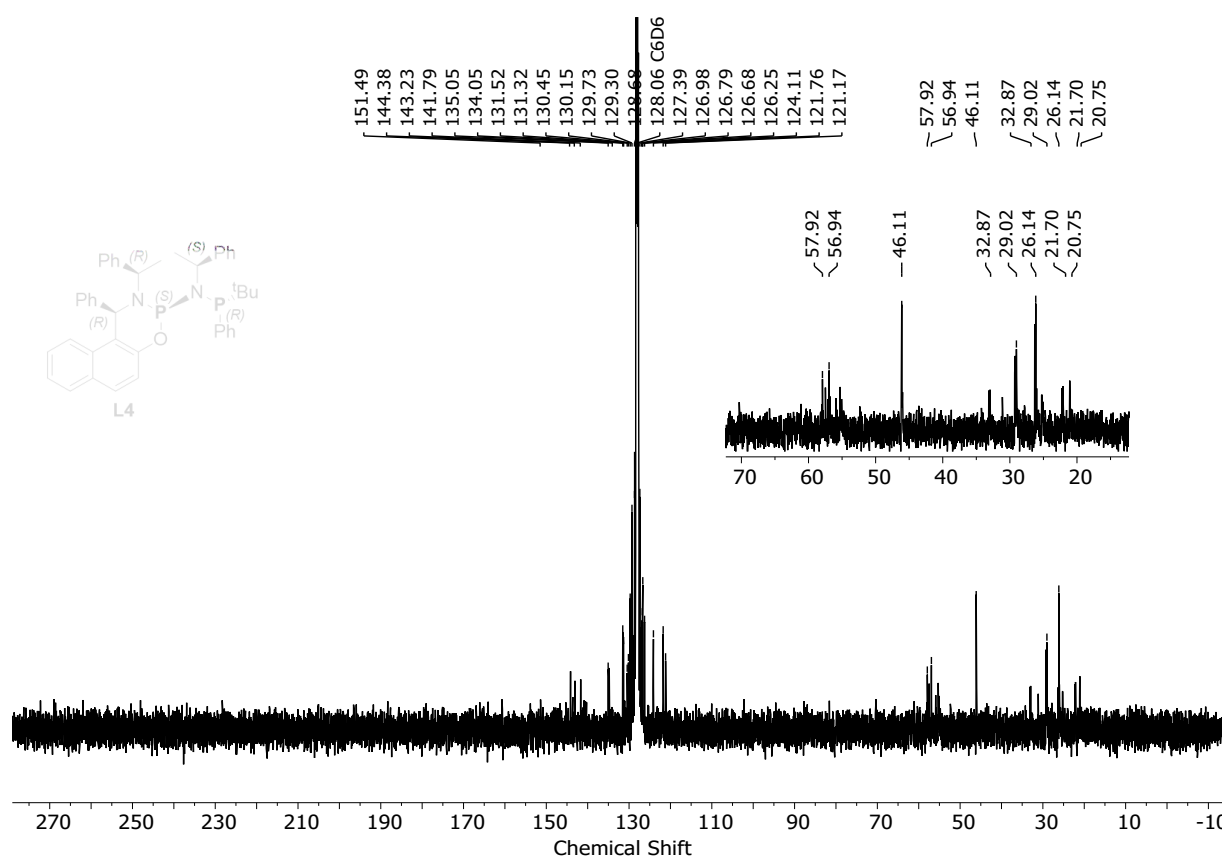

Figure S 16 <sup>13</sup>C NMR of (R,R,S<sub>P</sub>,S,R<sub>P</sub>)- L4

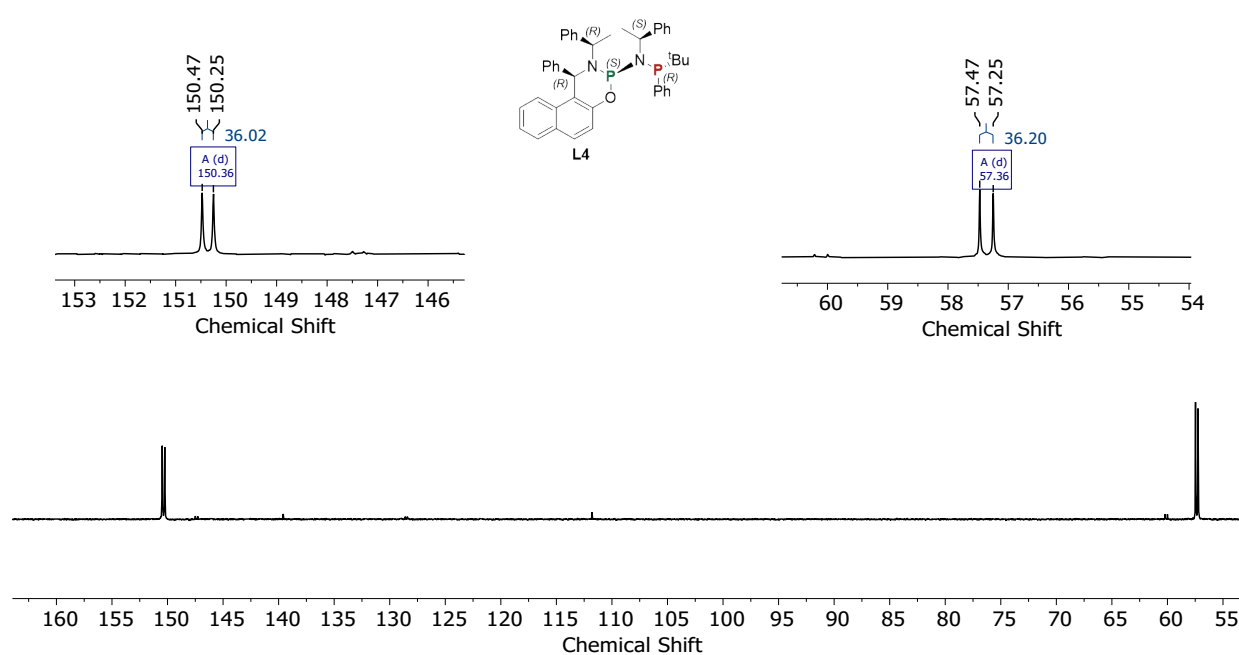

Figure S 17 <sup>31</sup>P {<sup>1</sup>H} NMR of (R,R,S<sub>P</sub>,S,R<sub>P</sub>)- L4

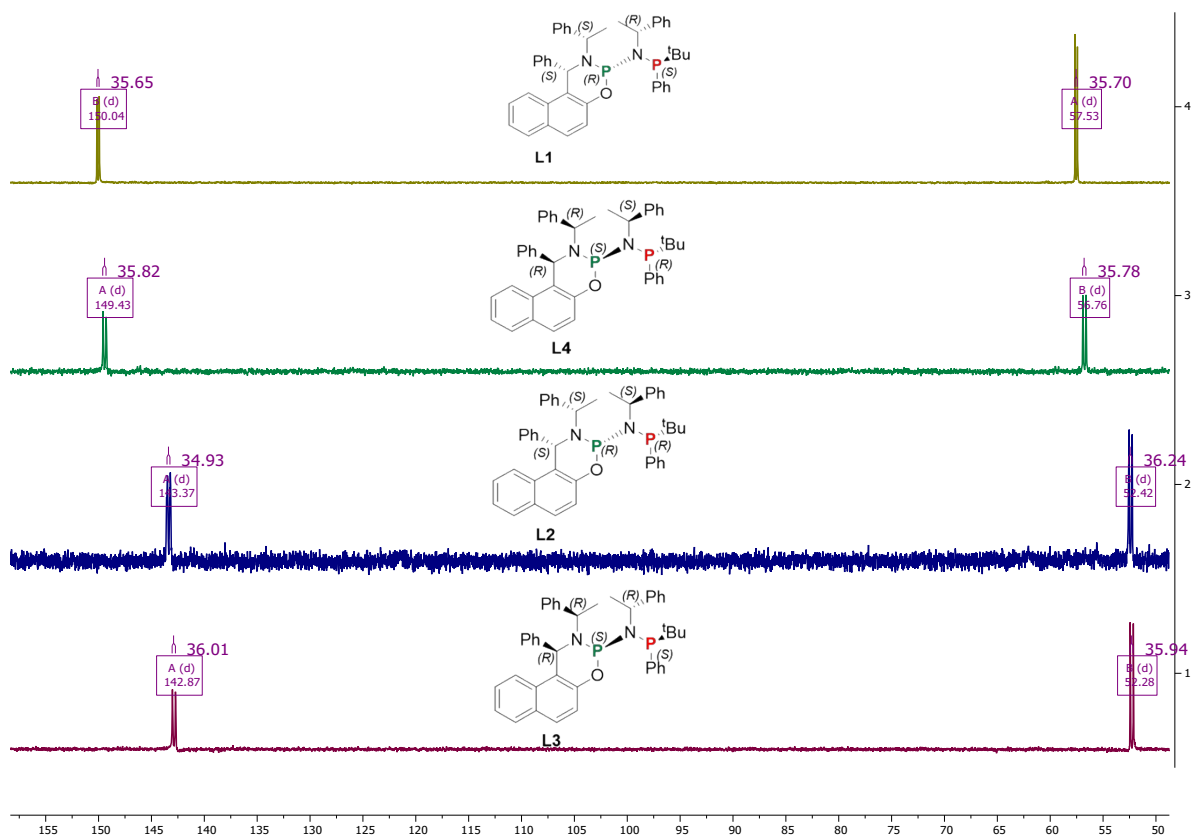

Figure S 18  $^{31}\text{P}$   $\{^1\text{H}\}$  NMR of the possible ligand combination

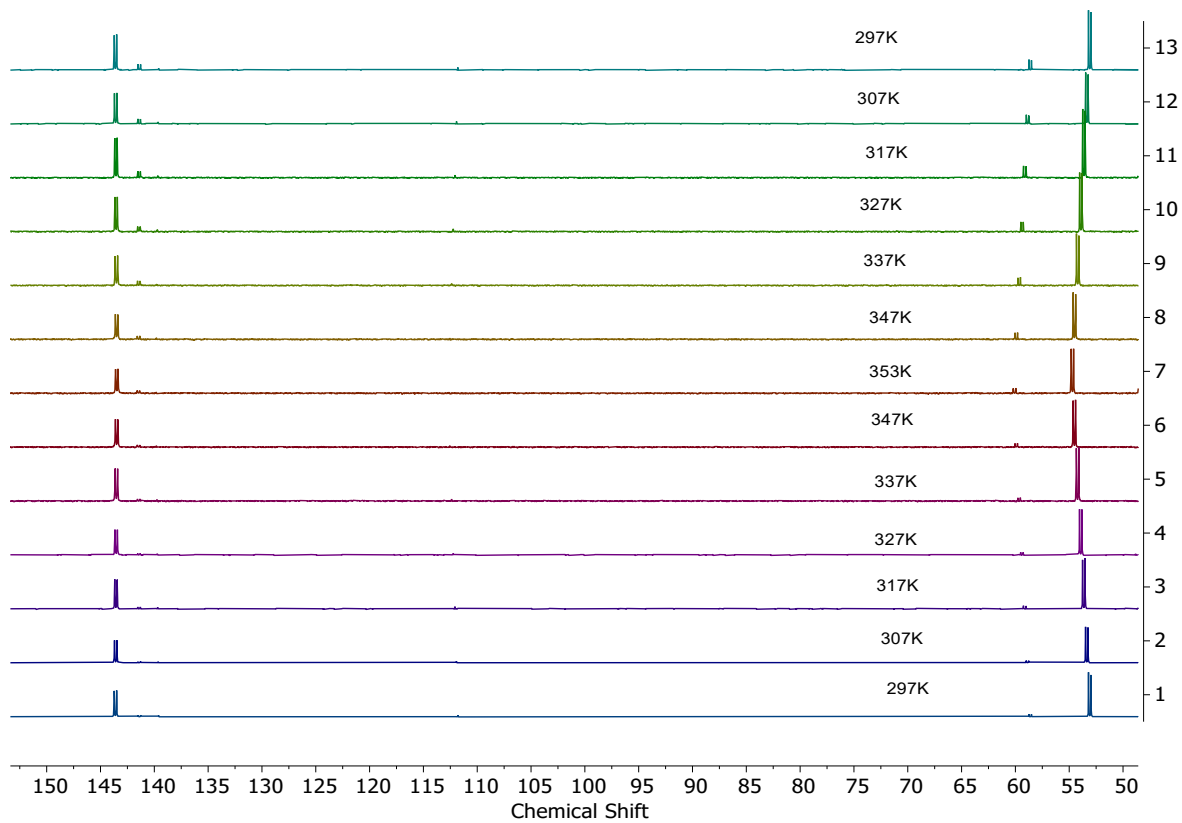

Figure S 19 Temperature dependent epimerization of  $S,S,R_p,S,R_p$ -L2.

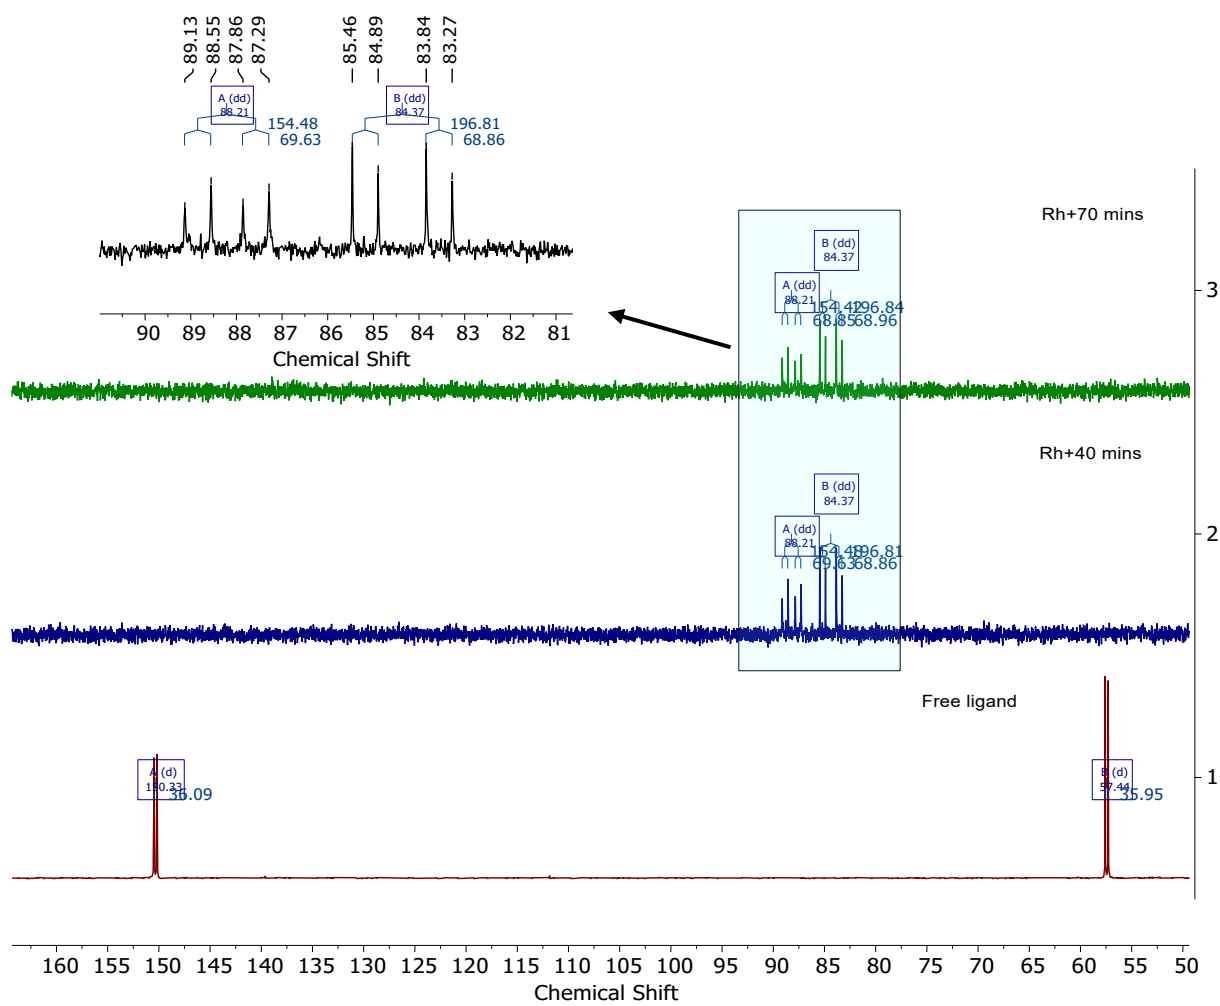

Figure S 20  $^{31}\text{P}$  NMR of In-situ Complexation studies using L2/Rh system (in Methanol- $d_4$ ).

- HRMS of the ligands

Page 1

---

**ESI-TOF Accurate Mass Report**

Results file: E:\Projects\2106.PRO\SampleDB\2106.rpt  
 Last modified: Friday, June 04, 2021 08:24:26

**Sample Summary:**

| Sample | File     | Sample Name | User          | Target   | Formula     | Expected Mass | Observed Mass | Error PPM | Error mDa |
|--------|----------|-------------|---------------|----------|-------------|---------------|---------------|-----------|-----------|
| 58     | 21060404 | SDC-I-1     | :hakraborttty | 666.2929 | C43H44N2OP2 | 667.3007      | 667.3005      | -0.3      | -0.2      |

*Figure S 21 HRMS of (S,S,R<sub>p</sub>,R,S<sub>p</sub>)- L1*

**ESI-TOF Accurate Mass Report**

Results file: E:\Projects\2106.PRO\SampleDB\2106.rpt  
Last modified: Friday, June 04, 2021 08:27:01

**Sample Summary:**

| Sample | File     | Sample Name | User       | Target   | Formula    | Expected Mass | Observed Mass | Error PPM | Error mDa |
|--------|----------|-------------|------------|----------|------------|---------------|---------------|-----------|-----------|
| 59     | 21060405 | SDC-I-2     | hakrabortt | 666.2929 | C43H44N2O2 | 667.3007      | 667.3011      | 0.6       | 0.4       |

**Figure S 22 HRMS of (S,S,R<sub>p</sub>,S,R<sub>p</sub>)- L2**

ESI-TOF Accurate Mass Report

Results file: E:\Projects\2006.PRO\SampleDB\2006.rpt  
Last modified: Monday, June 22, 2020 16:34:04

Sample Summary:

| Sample | File     | Sample Name | User         | Target   | Formula    | Expected Mass | Observed Mass | Error PPM | Error mDa |
|--------|----------|-------------|--------------|----------|------------|---------------|---------------|-----------|-----------|
| 172    | 20062212 | SDC-152     | Chakrabortty | 666.2929 | C43H44N2O2 | 667.3007      | 667.3020      | 1.9       | 1.3       |

Figure S 23 HRMS of (R,R,S<sub>P</sub>,R,S<sub>P</sub>)- L3

ESI-TOF Accurate Mass Report

Results file: E:\Projects\2106.PRO\SampleDB\2106.rpt  
Last modified: Friday, June 04, 2021 08:32:18

Sample Summary:

| Sample | File     | Sample Name | User        | Target   | Formula    | Expected Mass | Observed Mass | Error PPM | Error mDa |
|--------|----------|-------------|-------------|----------|------------|---------------|---------------|-----------|-----------|
| 61     | 21060407 | SDC-L-4     | hakrabortty | 666.2329 | C43H44N2O2 | 667.3007      | 667.3016      | 1.3       | 0.9       |

Figure S 24 HRMS of (R,R,S<sub>p</sub>,S,R<sub>p</sub>)- L4



## ■ NMR of the hydrogenated products

All the hydrogenated products have been characterized and matched with the literature reports.<sup>2,3</sup>

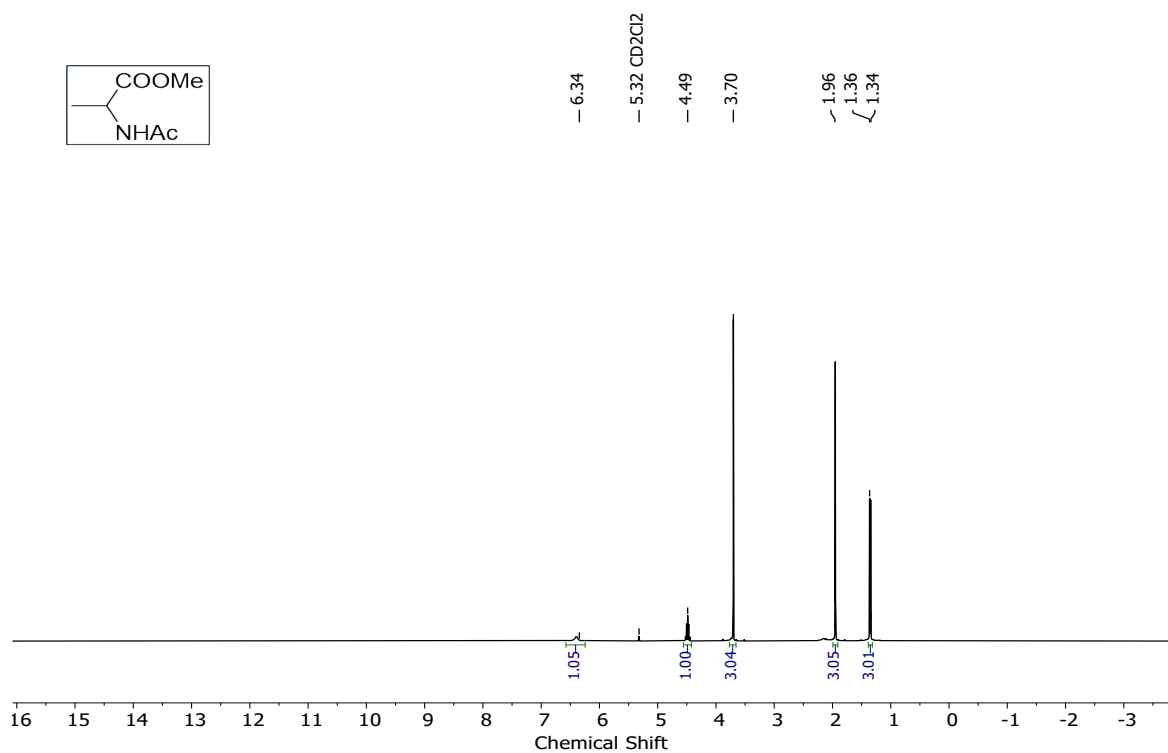

Figure S 25 <sup>1</sup>H NMR of 1b

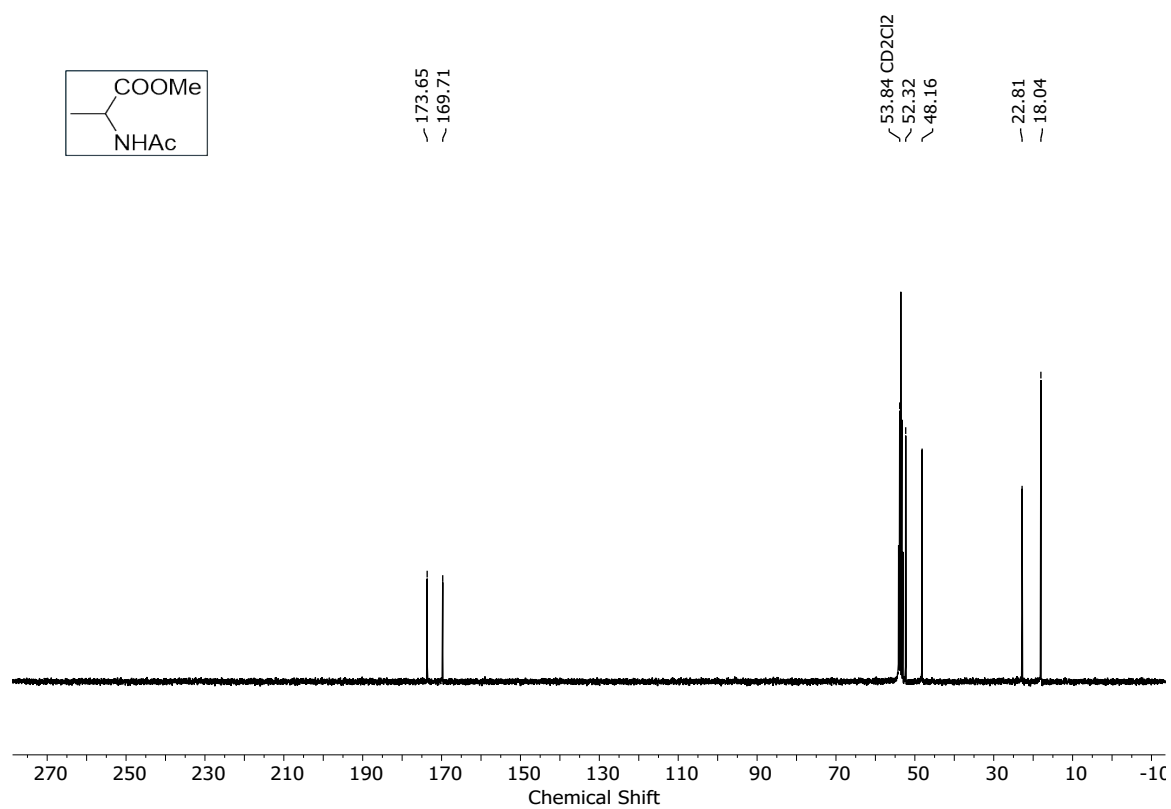

Figure S 26 <sup>13</sup>C NMR of 1b

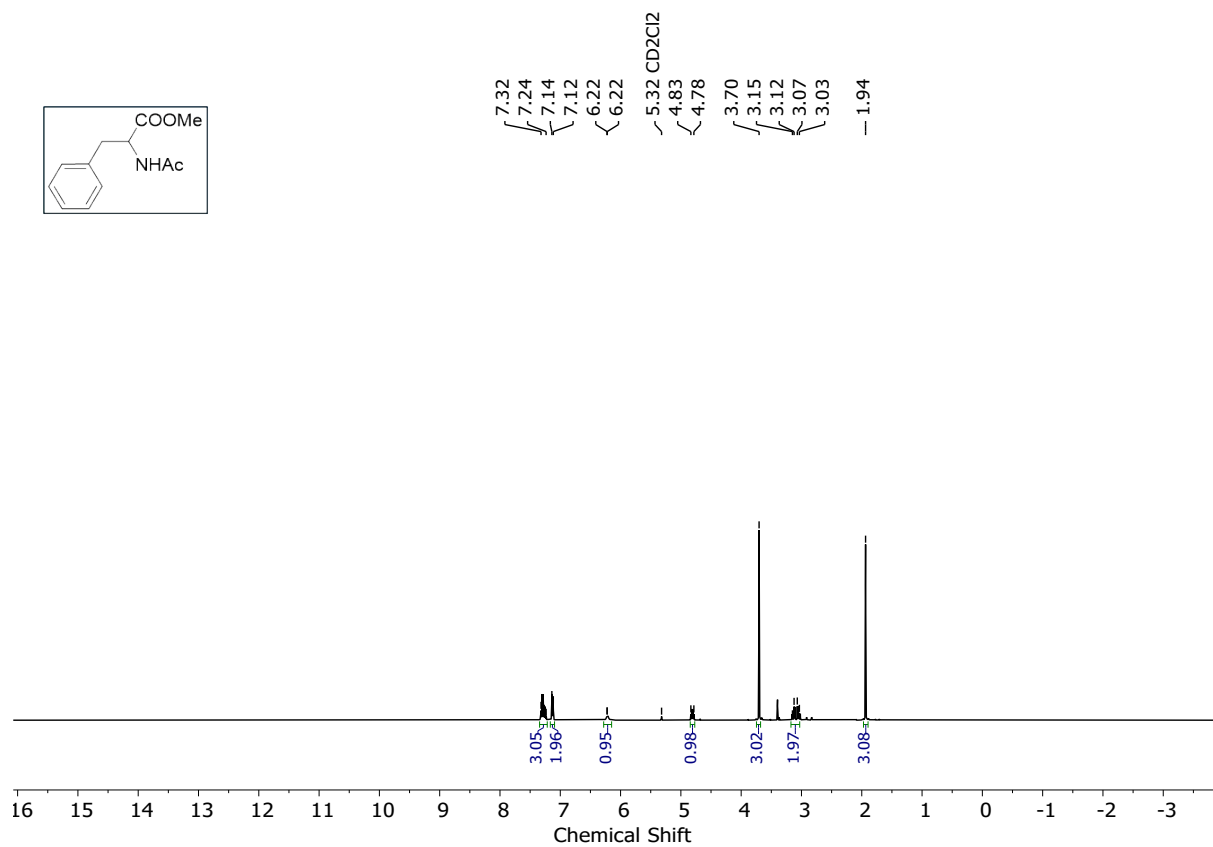

Figure S 27 <sup>1</sup>H NMR of **1c**

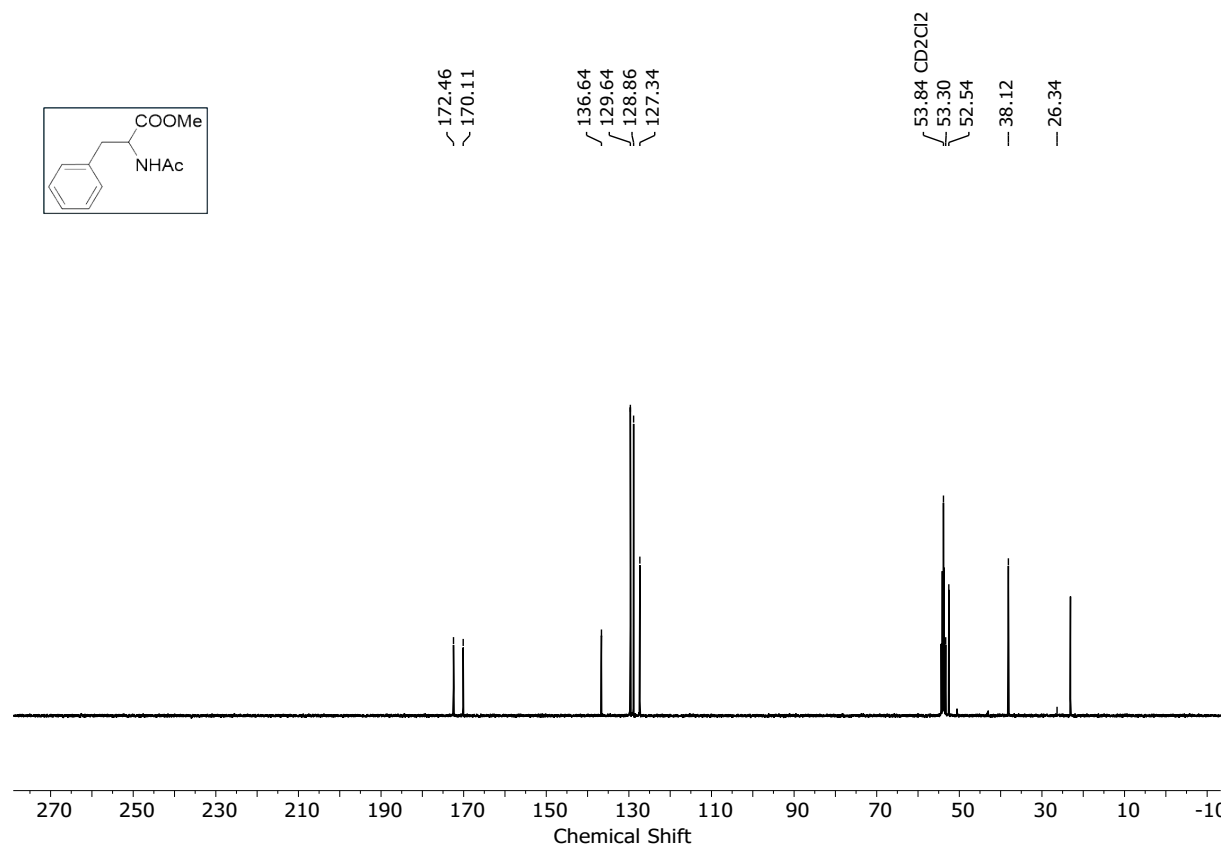

Figure S 28 <sup>13</sup>C NMR of **1c**

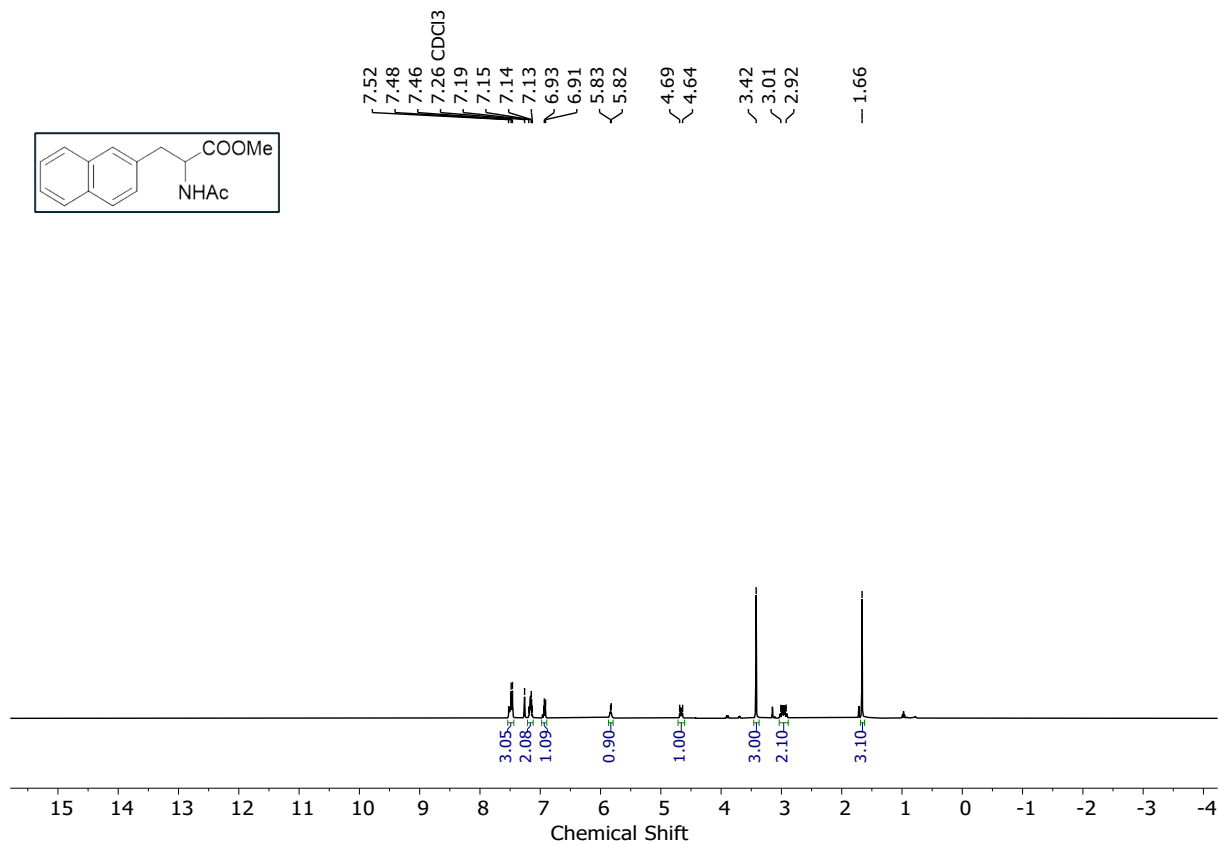

Figure S 29  $^1\text{H}$  NMR of **1d**

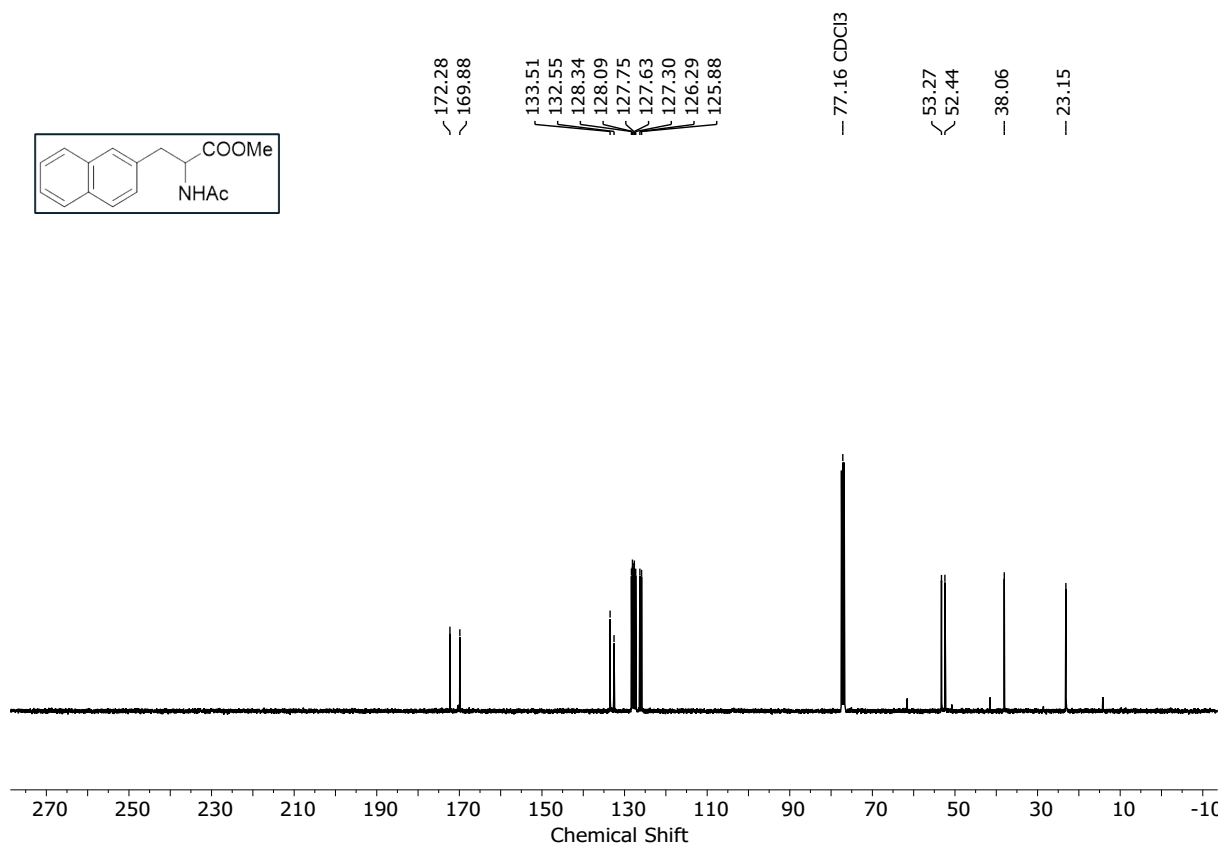

Figure S 30  $^{13}\text{C}$  NMR of **1d**

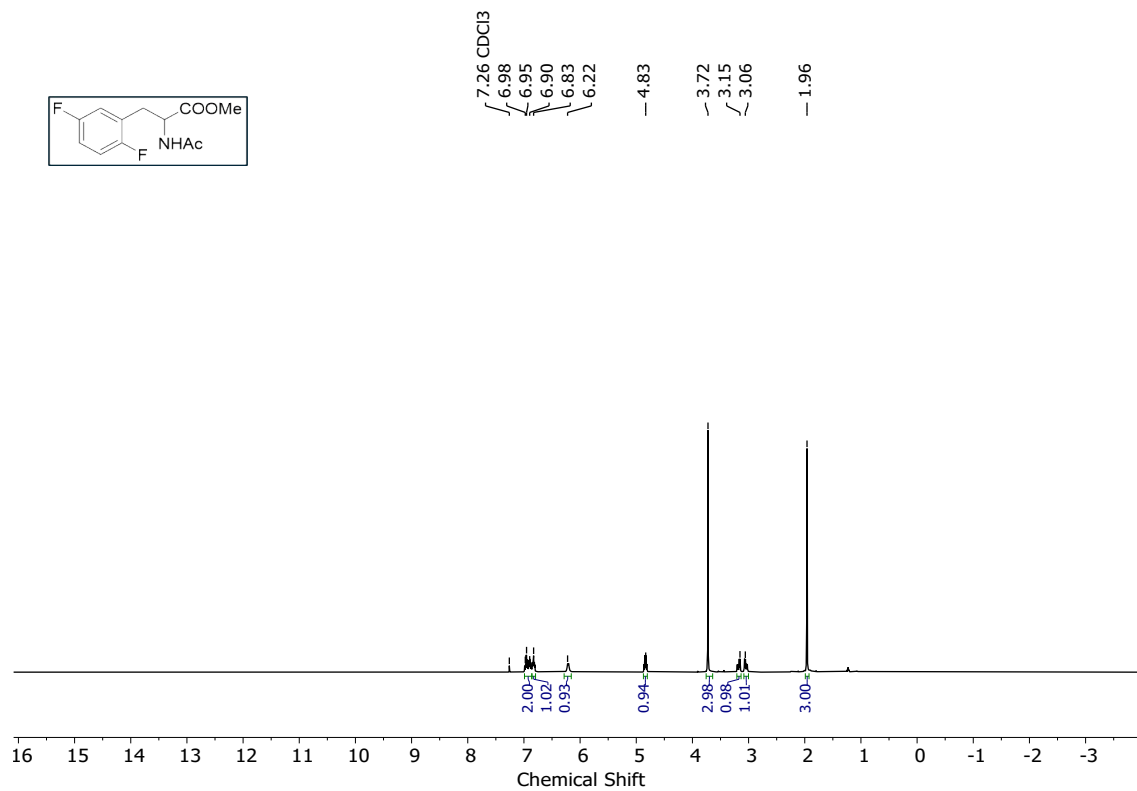

Figure S 31 <sup>1</sup>H NMR of **1e**

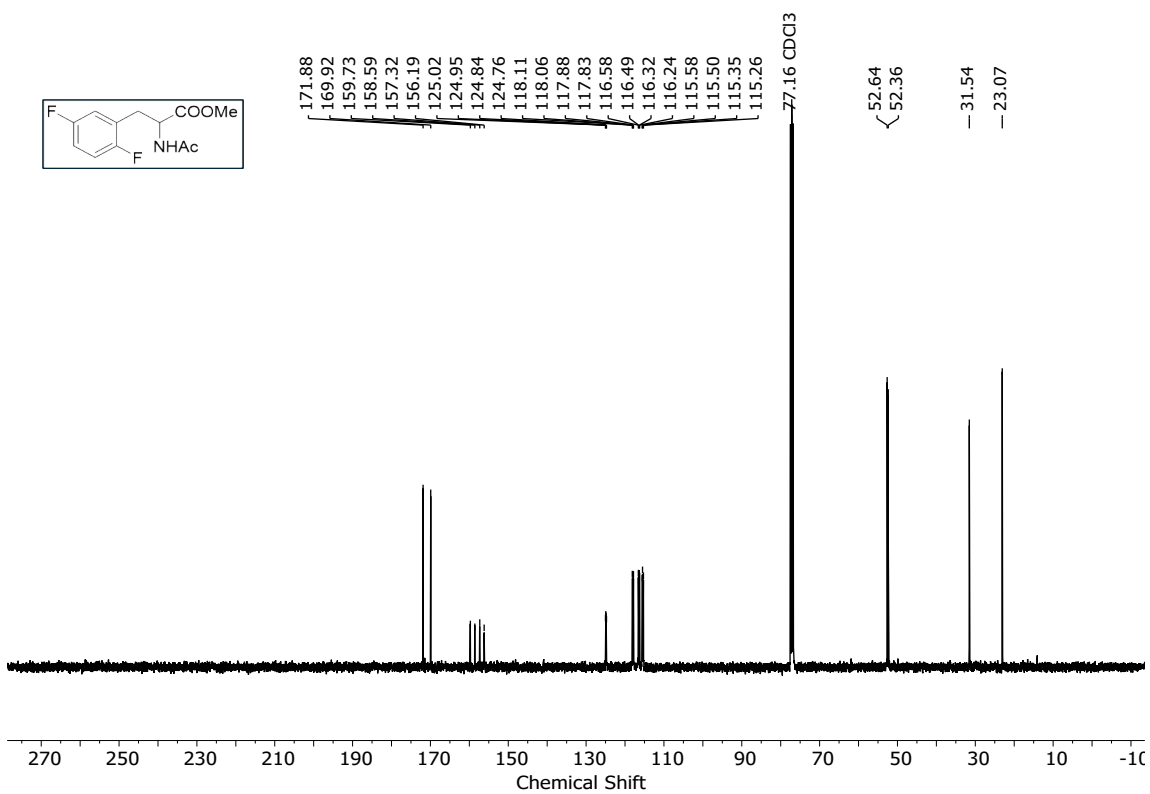

Figure S 32 <sup>13</sup>C NMR of **1e**

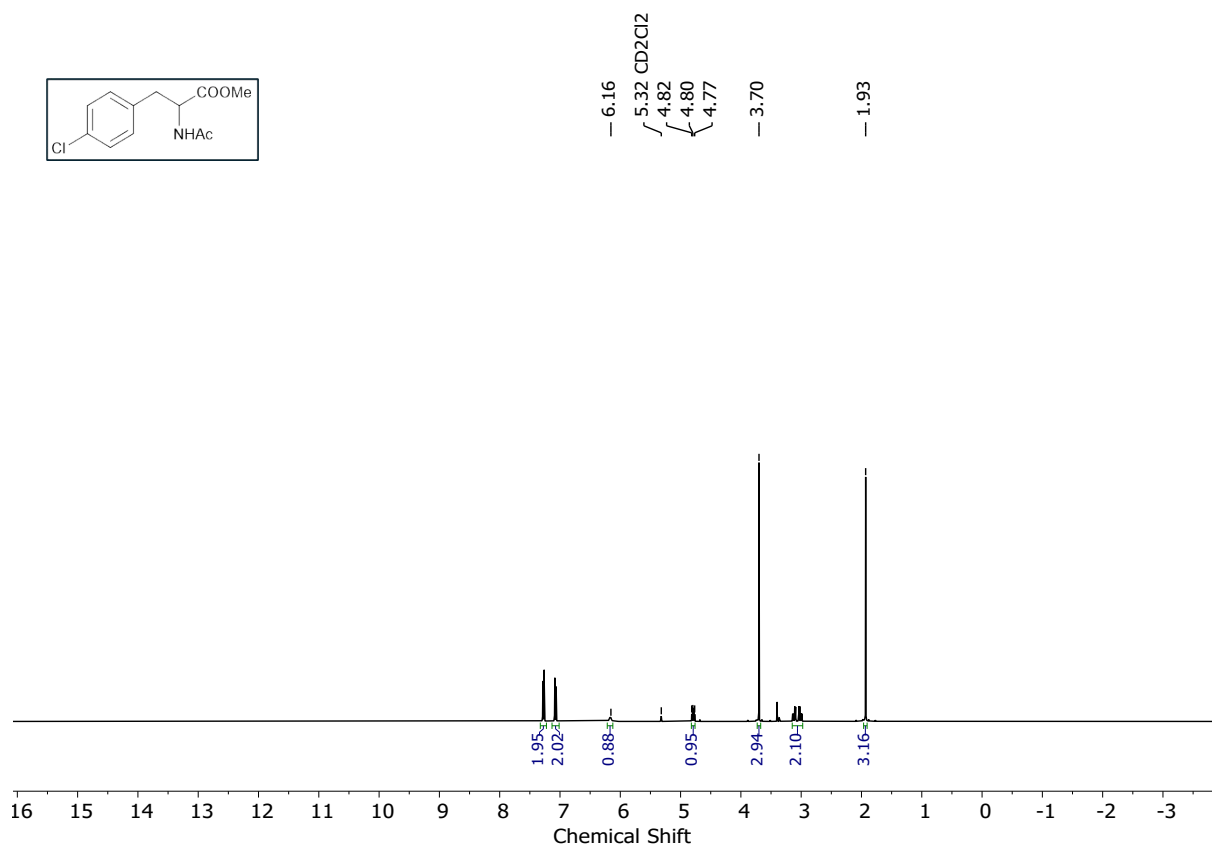

Figure S 33 <sup>1</sup>H NMR of **1f**

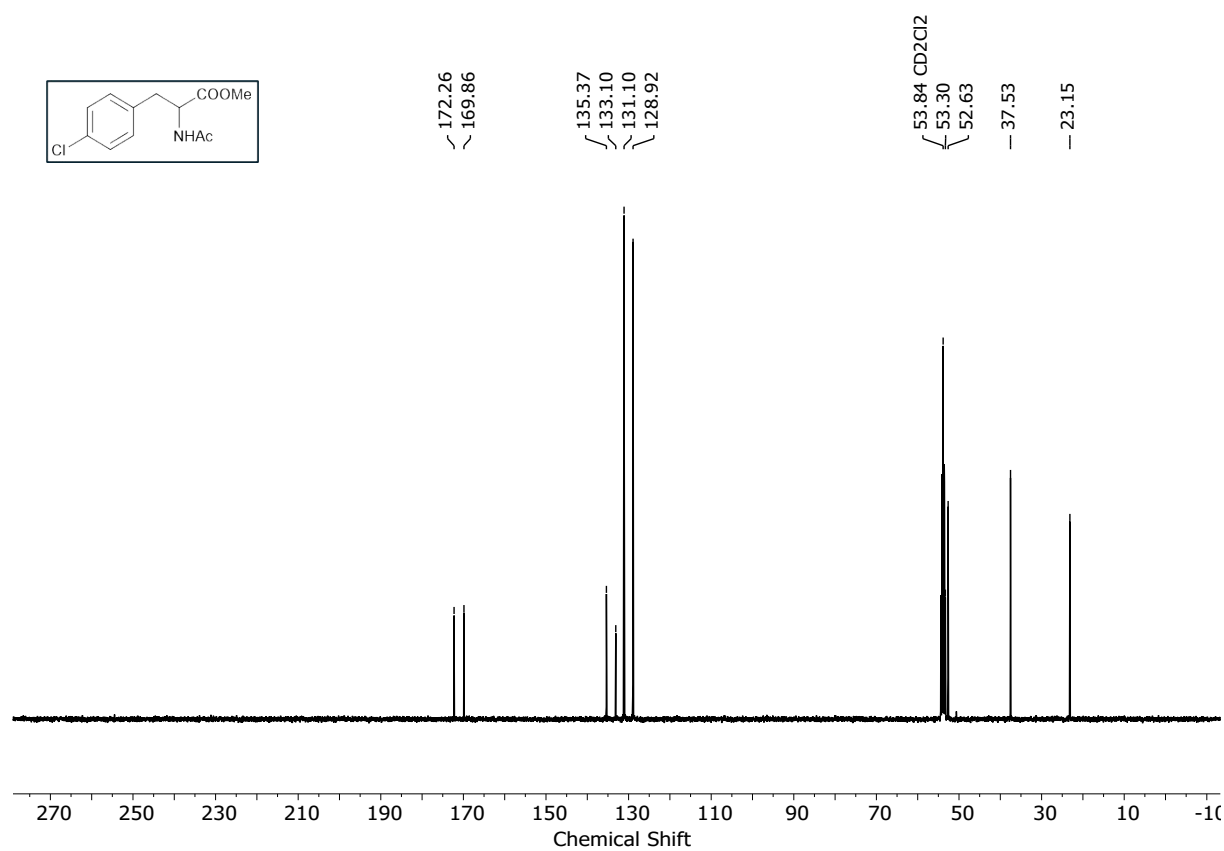

Figure S 34 <sup>13</sup>C NMR of **1f**

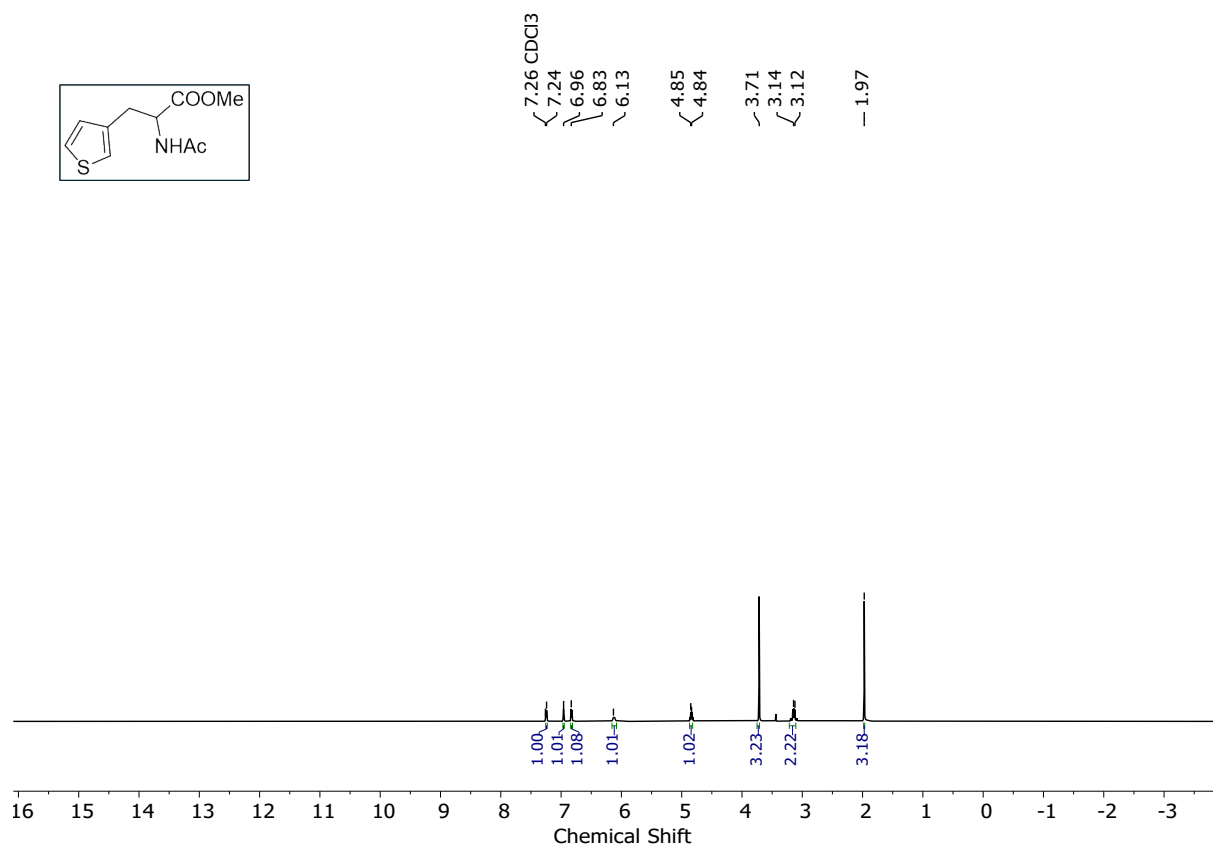

Figure S 35 <sup>1</sup>H NMR of **1g**

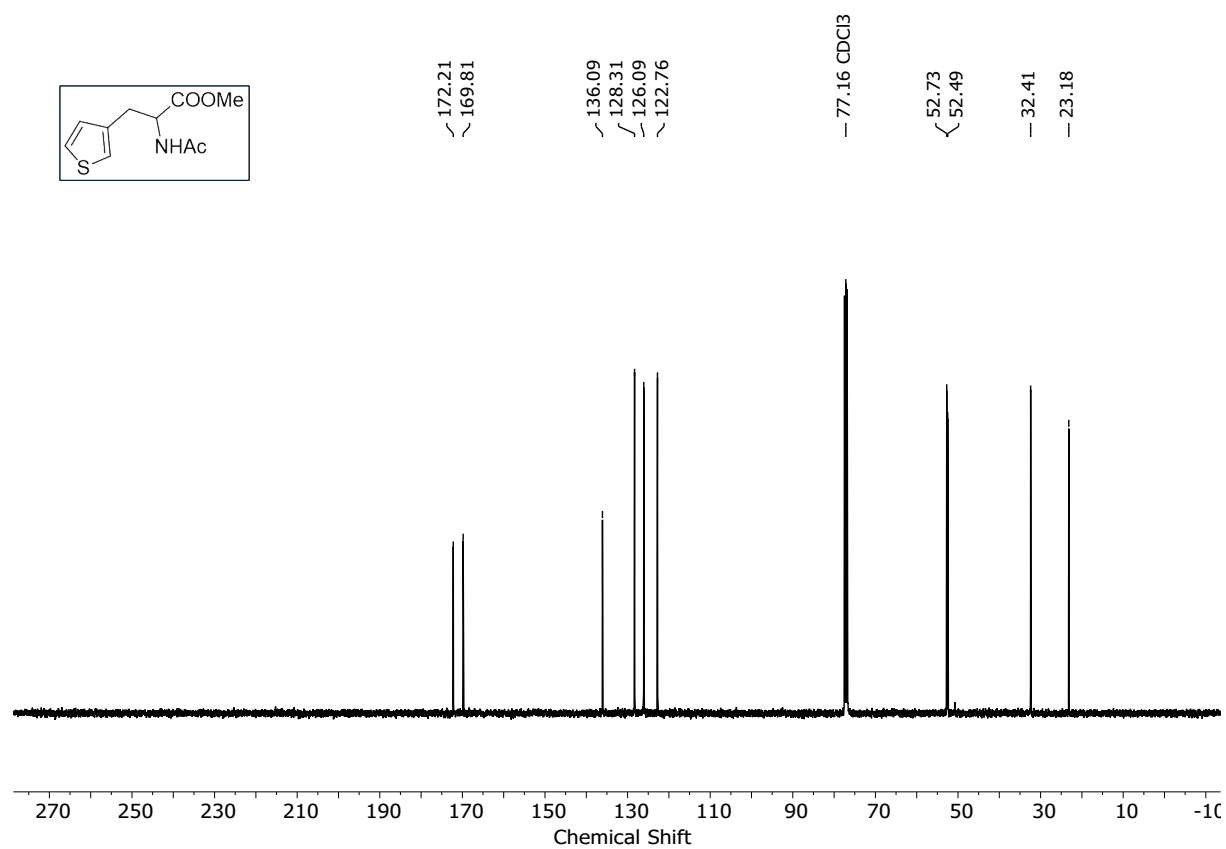

Figure S 36 <sup>13</sup>C NMR of **1g**

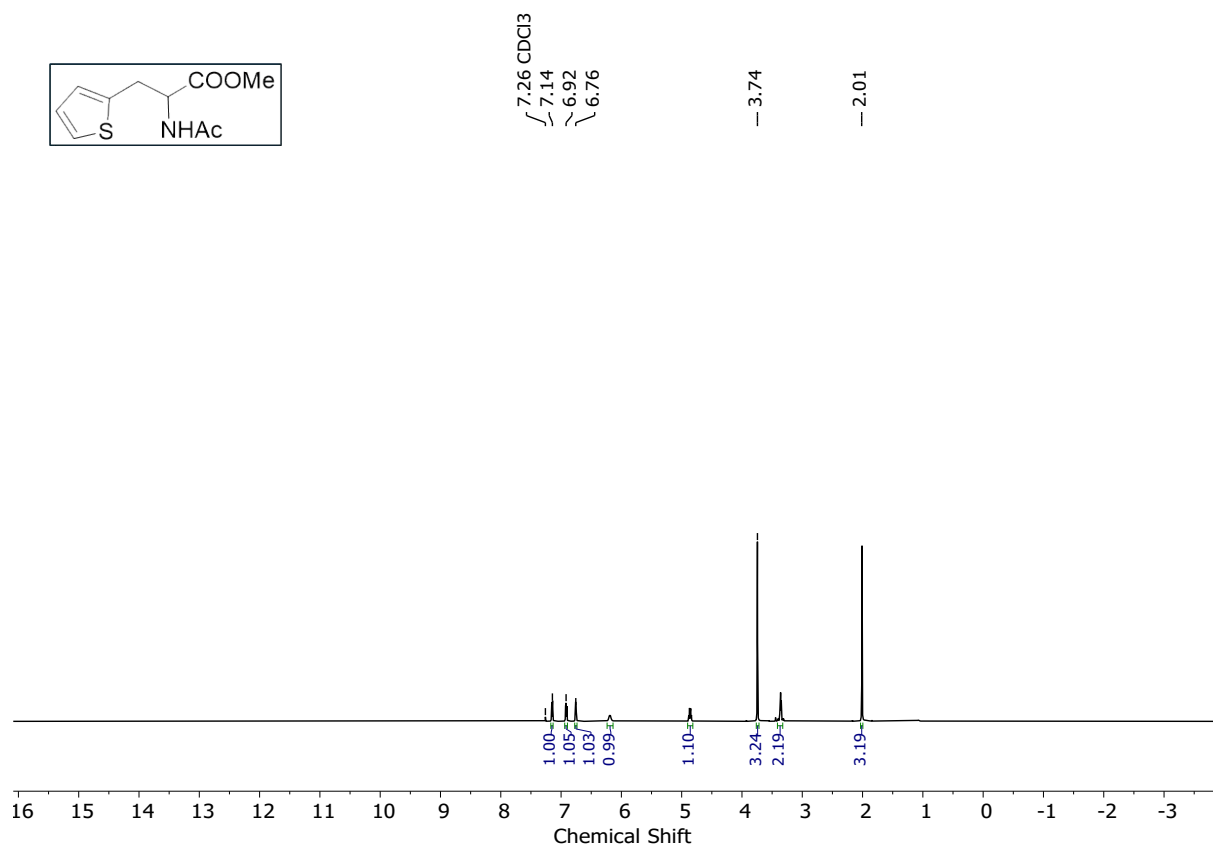

Figure S 37 <sup>1</sup>H NMR of **1h**

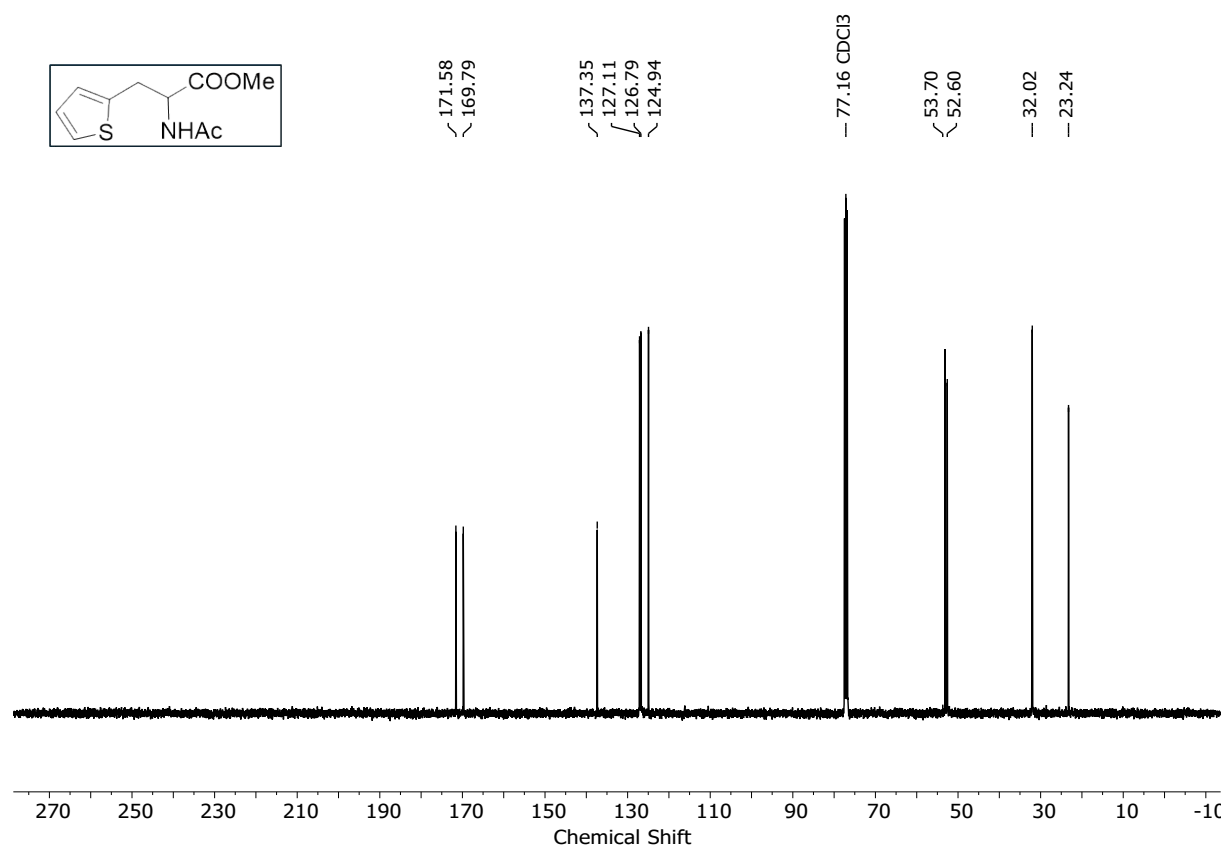

Figure S 38 <sup>13</sup>C NMR of **1h**

▪ **HPLC Traces for enantiomeric excess determination of the product**

*Method Information for HPLC*

| Substrate        | Column                          |
|------------------|---------------------------------|
| <b>1b</b>        | 25m Lipodex E 90/40-6-200/10    |
| <b>1a, 1c-1h</b> | Chiralcel OJ-H Heptan/EtOH 95:5 |
| <b>2a</b>        | AD-H, Heptan/EtOH 90:10         |

• **Asymmetric Hydrogenation**

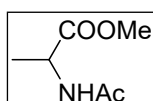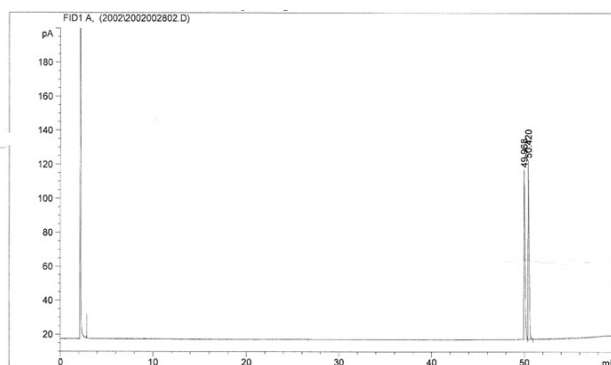

| Peak # | RetTime [min] | Type | Width [min] | Area [pA*s] | Height [pA] | Area %   |
|--------|---------------|------|-------------|-------------|-------------|----------|
| 1      | 49.968        | BV   | 0.1062      | 839.65417   | 99.74786    | 50.08221 |
| 2      | 50.420        | VB   | 0.1073      | 836.89764   | 105.11221   | 49.91779 |

**Figure S 39** HPLC traces of racemic **1b**

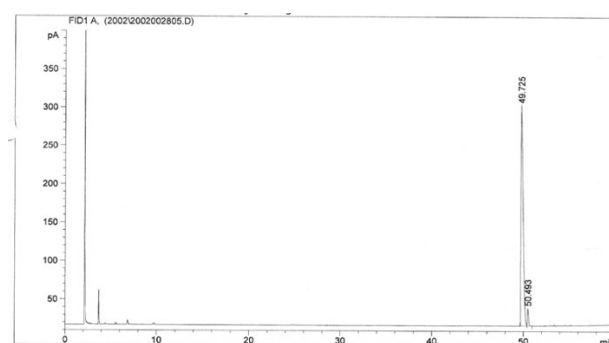

| Peak # | RetTime [min] | Type | Width [min] | Area [pA*s] | Height [pA] | Area %   |
|--------|---------------|------|-------------|-------------|-------------|----------|
| 1      | 49.725        | BV   | 0.2083      | 4816.83594  | 287.48532   | 95.93251 |
| 2      | 50.493        | VB   | 0.1139      | 204.23126   | 22.84838    | 4.06749  |

**Figure S 40** HPLC traces of enantioenriched product **1b** using *Rh/S,S,R<sub>P</sub>,S,R<sub>P</sub>-L2* catalytic system



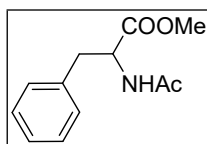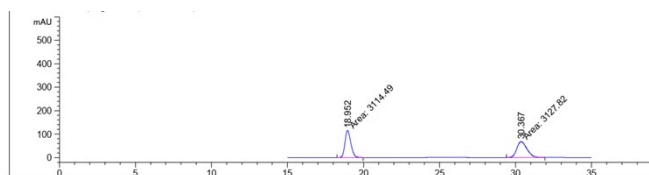

=====  
Area Percent Report  
=====

Sorted By : Signal  
Multiplier : 1.0000  
Dilution : 1.0000  
Use Multiplier & Dilution Factor with ISTDs

Signal 1: DAD1 C, Sig=210,8 Ref=360,100

| Peak # | RetTime [min] | Type | Width [min] | Area [mAU*s] | Height [mAU] | Area %  |
|--------|---------------|------|-------------|--------------|--------------|---------|
| 1      | 18.952        | BB   | 0.4152      | 1.14948e4    | 428.20901    | 49.8758 |
| 2      | 30.367        | BB   | 0.7183      | 1.15520e4    | 250.38875    | 50.1242 |

**Figure S 41** HPLC traces of racemic **1c**

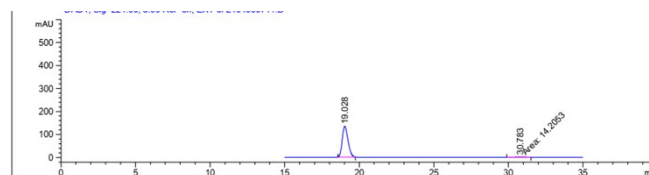

=====  
Area Percent Report  
=====

Sorted By : Signal  
Multiplier : 1.0000  
Dilution : 1.0000  
Use Multiplier & Dilution Factor with ISTDs

Signal 1: DAD1 C, Sig=210,8 Ref=360,100

| Peak # | RetTime [min] | Type | Width [min] | Area [mAU*s] | Height [mAU] | Area %  |
|--------|---------------|------|-------------|--------------|--------------|---------|
| 1      | 19.028        | BB   | 0.4184      | 1.36842e4    | 504.55905    | 99.5712 |
| 2      | 30.784        | NM   | 0.8223      | 58.93432     | 1.19445      | 0.4288  |

**Figure S 42** HPLC traces of enantioenriched product **1c** using *Rh/S,S,R<sub>P</sub>,S,R<sub>P</sub>-L2* catalytic system

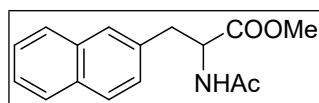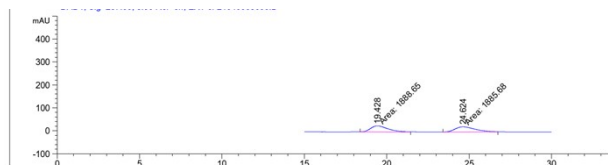

=====  
Area Percent Report  
=====

Sorted By : Signal  
Multiplier : 1.0000  
Dilution : 1.0000  
Use Multiplier & Dilution Factor with ISTDs

Signal 1: DAD1 C, Sig=210,8 Ref=360,100

| Peak #   | RetTime [min] | Type | Width [min] | Area [mAU*s] | Height [mAU] | Area %  |
|----------|---------------|------|-------------|--------------|--------------|---------|
| 1        | 19.433        | NM   | 1.1908      | 1.89320e4    | 264.98242    | 49.9287 |
| 2        | 24.630        | BB   | 1.2766      | 1.89861e4    | 224.06425    | 50.0713 |
| Totals : |               |      |             | 3.79181e4    | 489.04668    |         |

**Figure S 43** HPLC traces of racemic **1d**

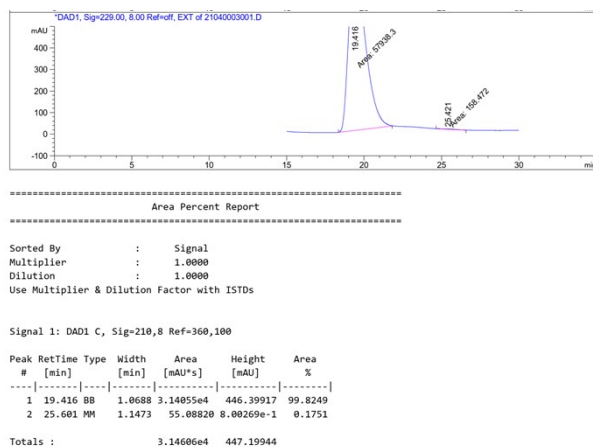

Figure S 44 HPLC traces of enantioenriched product **1d** using *Rh/S,S,R<sub>p</sub>,S,R<sub>p</sub>-L2* catalytic system

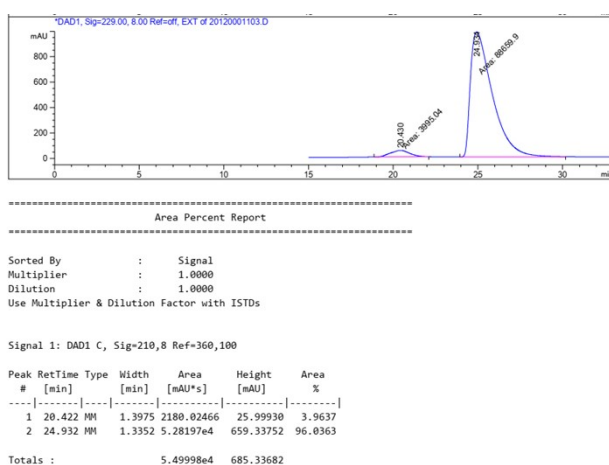

Figure S 45 HPLC traces of enantioenriched product **1d** using *Rh/R,R,S<sub>p</sub>,R,S<sub>p</sub>-L3* catalytic system.

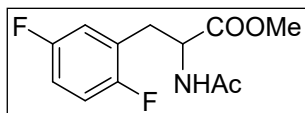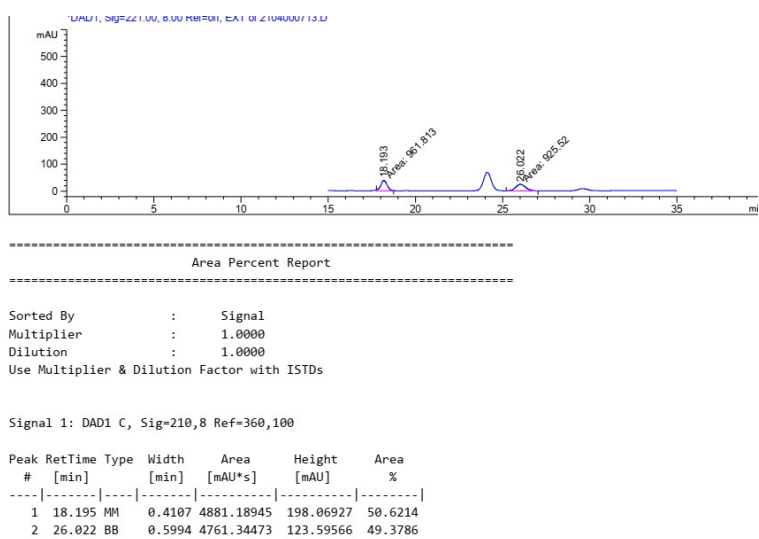

Figure S 46 HPLC traces of racemic **1e**

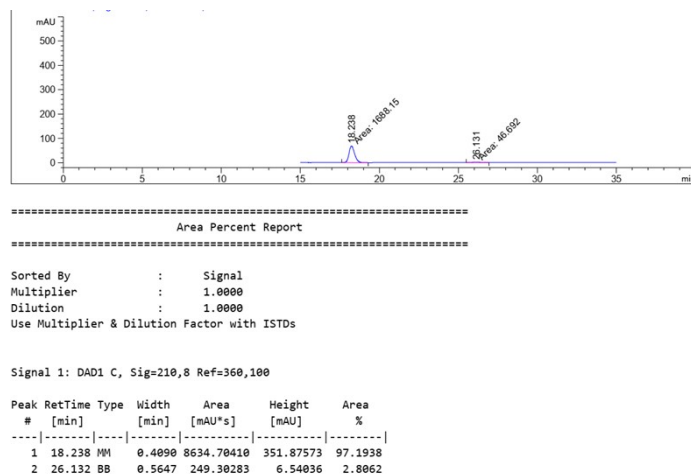

Figure S 47 HPLC traces of enantioenriched product **1e** using *Rh/S,S,R<sub>p</sub>,S,R<sub>p</sub>-L2* catalytic system

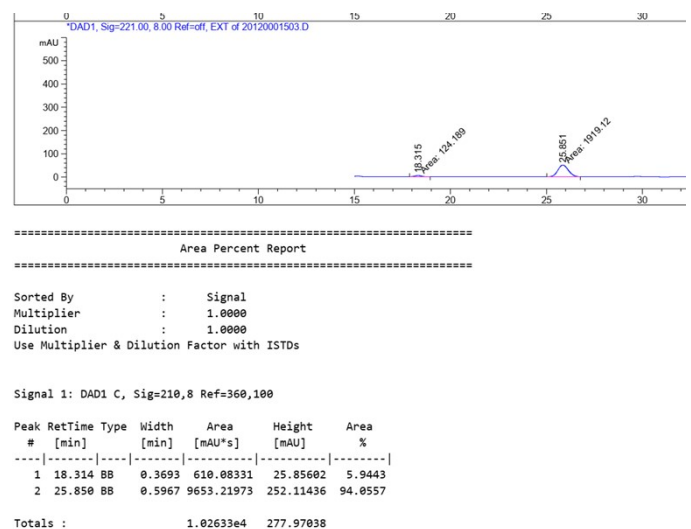

Figure S 48 HPLC traces of enantioenriched product **1e** using *Rh/R,R,S<sub>p</sub>,R,S<sub>p</sub>-L3* catalytic system.

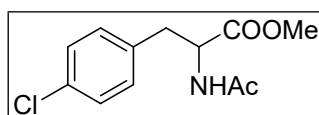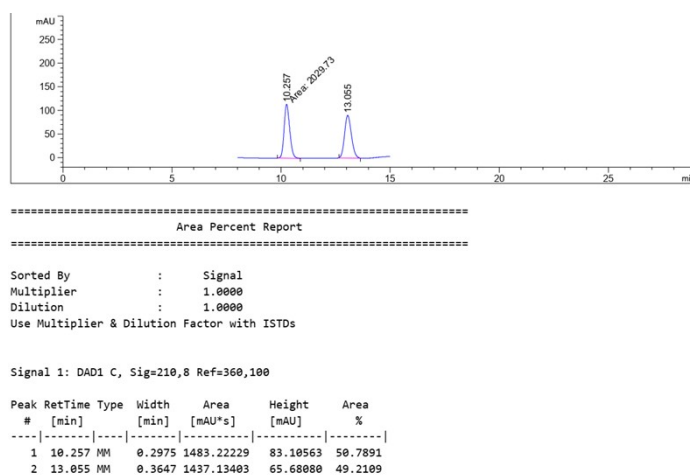

Figure S 49 HPLC traces of racemic **1f**

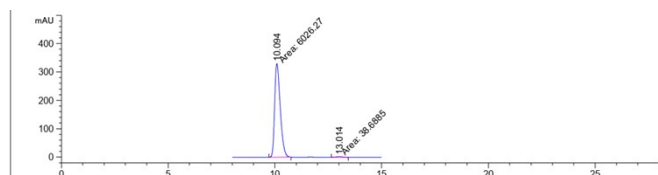

=====  
Area Percent Report  
=====

Sorted By : Signal  
Multiplier : 1.0000  
Dilution : 1.0000  
Use Multiplier & Dilution Factor with ISTDs

Signal 1: DAD1 C, Sig=210,8 Ref=360,100

| Peak # | RetTime [min] | Type | Width [min] | Area [mAU*s] | Height [mAU] | Area %  |
|--------|---------------|------|-------------|--------------|--------------|---------|
| 1      | 10.094        | MM   | 0.3084      | 7780.92529   | 431.75073    | 99.4528 |
| 2      | 13.009        | BB   | 0.3065      | 42.81082     | 2.07715      | 0.5472  |

Figure S 50 HPLC traces of enantioenriched product **1f** using Rh/S,S,R<sub>p</sub>,S,R<sub>p</sub>-L2 catalytic system

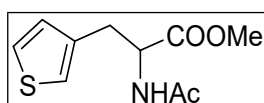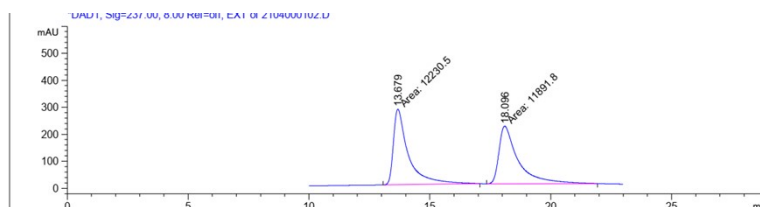

=====  
Area Percent Report  
=====

Sorted By : Signal  
Multiplier : 1.0000  
Dilution : 1.0000  
Use Multiplier & Dilution Factor with ISTDs

Signal 1: DAD1 C, Sig=210,8 Ref=360,100

| Peak # | RetTime [min] | Type | Width [min] | Area [mAU*s] | Height [mAU] | Area %  |
|--------|---------------|------|-------------|--------------|--------------|---------|
| 1      | 13.678        | MM   | 0.7358      | 8787.10645   | 199.05054    | 50.9399 |
| 2      | 18.096        | MM   | 0.9297      | 8462.84668   | 151.71397    | 49.0601 |

Figure S 51 HPLC traces of racemic **1g**

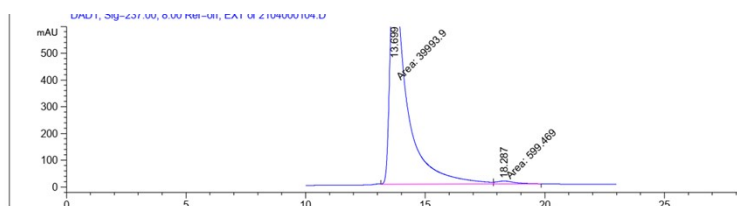

=====  
Area Percent Report  
=====

Sorted By : Signal  
Multiplier : 1.0000  
Dilution : 1.0000  
Use Multiplier & Dilution Factor with ISTDs

Signal 1: DAD1 C, Sig=210,8 Ref=360,100

| Peak # | RetTime [min] | Type | Width [min] | Area [mAU*s] | Height [mAU] | Area %  |
|--------|---------------|------|-------------|--------------|--------------|---------|
| 1      | 13.698        | MF   | 0.8000      | 2.86061e4    | 595.94580    | 98.3492 |
| 2      | 18.287        | FM   | 0.9872      | 480.16110    | 8.10677      | 1.6508  |

Figure S 52 HPLC traces of enantioenriched product **1g** using Rh/S,S,R<sub>p</sub>,S,R<sub>p</sub>-L2 catalytic system

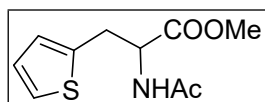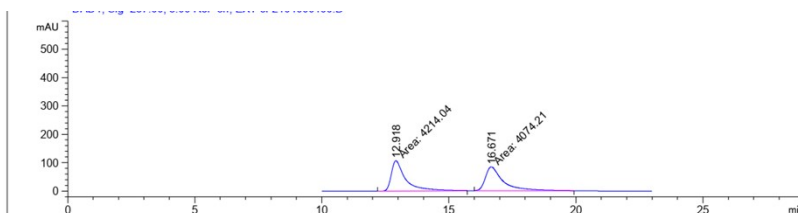

```

=====
                          Area Percent Report
=====
Sorted By      :      Signal
Multiplier     :      1.0000
Dilution      :      1.0000
Use Multiplier & Dilution Factor with ISTDs
  
```

Signal 1: DAD1 C, Sig=210,8 Ref=360,100

| Peak # | RetTime [min] | Type | Width [min] | Area [mAU*s] | Height [mAU] | Area %  |
|--------|---------------|------|-------------|--------------|--------------|---------|
| 1      | 12.917        | NM   | 0.6342      | 1556.58765   | 40.90533     | 50.8042 |
| 2      | 16.671        | NM   | 0.7738      | 1507.30933   | 32.46615     | 49.1958 |

Figure S 53 HPLC traces of racemic **1h**

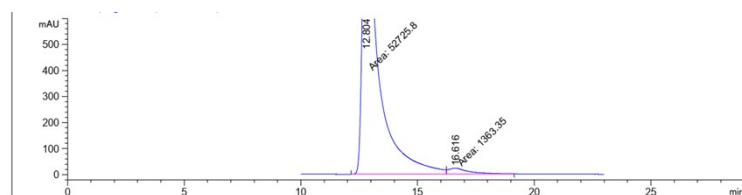

```

=====
                          Area Percent Report
=====
Sorted By      :      Signal
Multiplier     :      1.0000
Dilution      :      1.0000
Use Multiplier & Dilution Factor with ISTDs
  
```

Signal 1: DAD1 C, Sig=210,8 Ref=360,100

| Peak # | RetTime [min] | Type | Width [min] | Area [mAU*s] | Height [mAU] | Area %  |
|--------|---------------|------|-------------|--------------|--------------|---------|
| 1      | 12.804        | MF   | 0.7356      | 2.02327e4    | 458.38684    | 97.5042 |
| 2      | 16.617        | FM   | 1.0103      | 517.89771    | 8.54386      | 2.4958  |

Figure S 54 HPLC traces of enantioenriched product **1h** using *Rh/S,S,R<sub>P</sub>,S,R<sub>P</sub>-L2* catalytic system

- Asymmetric Allylic substitution

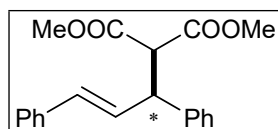

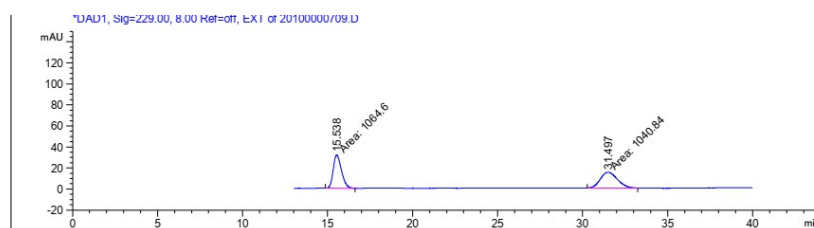

=====  
 Area Percent Report  
 =====

Sorted By : Signal  
 Multiplier : 1.0000  
 Dilution : 1.0000  
 Use Multiplier & Dilution Factor with ISTDs

Signal 1: DAD1 C, Sig=210,8 Ref=360,100

| Peak # | RetTime [min] | Type | Width [min] | Area [mAU*s] | Height [mAU] | Area %  |
|--------|---------------|------|-------------|--------------|--------------|---------|
| 1      | 15.537        | BB   | 0.5236      | 3770.37988   | 111.77082    | 50.3355 |
| 2      | 31.491        | BB   | 1.0424      | 3720.12598   | 53.55556     | 49.6645 |

Totals : 7490.50586 165.32639

**Figure S 55** HPLC traces of racemic **2a**

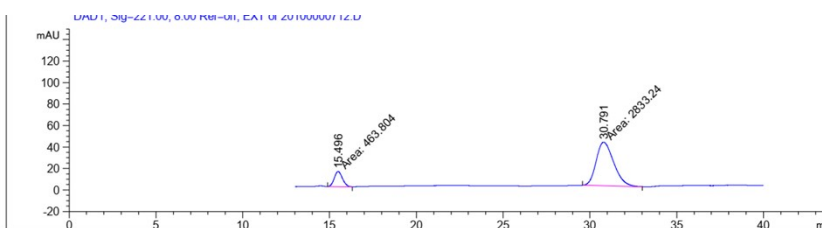

=====  
 Area Percent Report  
 =====

Sorted By : Signal  
 Multiplier : 1.0000  
 Dilution : 1.0000  
 Use Multiplier & Dilution Factor with ISTDs

Signal 1: DAD1 C, Sig=210,8 Ref=360,100

| Peak # | RetTime [min] | Type | Width [min] | Area [mAU*s] | Height [mAU] | Area %  |
|--------|---------------|------|-------------|--------------|--------------|---------|
| 1      | 15.492        | BB   | 0.4981      | 1005.13135   | 31.01613     | 13.7832 |
| 2      | 30.791        | MM   | 1.1699      | 6287.32129   | 89.57087     | 86.2168 |

Totals : 7292.45264 120.58700

**Figure S 56** HPLC traces of enantioenriched product **2a** using *Pd/ R,R,S<sub>P</sub>,S,R<sub>P</sub>-L4* catalytic system.

## ▪ X-ray Crystallographic data

Single crystals were prepared under argon and measured under a continuous flow of nitrogen on a Bruker Kappa APEX II Duo diffractometer. The structure was solved by direct methods (SHELXS-97: Sheldrick, G. M. Acta Cryst. 2008, A64, 112.) and refined by full-matrix least-squares procedures on F<sup>2</sup>

(SHELXL-2018: Sheldrick, G. M. *Acta Cryst.* 2015, C71, 3.). XP (Bruker AXS) was used for graphical representations.

CCDC 2091899 contains the supplementary crystallographic data for this paper. These data are provided free of charge by the joint Cambridge Crystallographic Data Centre and Fachinformationszentrum Karlsruhe Access Structures service [www.ccdc.cam.ac.uk/structures](http://www.ccdc.cam.ac.uk/structures).

Crystal data of *S,S,R<sub>p</sub>,R,S<sub>p</sub>-L1*: C<sub>43</sub>H<sub>44</sub>N<sub>2</sub>OP<sub>2</sub>, *M* = 666.74, orthorhombic, space group *P2<sub>1</sub>2<sub>1</sub>2<sub>1</sub>*, *a* = 10.0784(3), *b* = 11.7543(3), *c* = 30.5885(7) Å, *V* = 3623.65(16) Å<sup>3</sup>, *T* = 150(2) K, *Z* = 4, 30024 reflections measured, 6377 independent reflections (*R*<sub>int</sub> = 0.0251), final *R* values (*I* > 2σ(*I*)): *R*<sub>1</sub> = 0.0246, *wR*<sub>2</sub> = 0.0645, final *R* values (all data): *R*<sub>1</sub> = 0.0247, *wR*<sub>2</sub> = 0.0646, 438 parameters, largest diff. peak/hole: 0.38/-0.25 eÅ<sup>-3</sup>, Flack parameter *x* = -0.002(4).

## ■ Reference

1. B. Roy, E. Das, A. Roy and D. Mal, *Organic & Biomolecular Chemistry*, 2020, **18**, 3697-3706.
2. M. Biosca, P. de la Cruz-Sanchez, O. Pamies and M. Dieguez, *J Org Chem*, 2020, **85**, 4730-4739.
3. M. van den Berg, A. J. Minnaard, R. M. Haak, M. Leeman, E. P. Schudde, A. Meetsma, B. L. Feringa, A. H. M. de Vries, C. E. P. Maljaars, C. E. Willans, D. Hyett, J. A. F. Boogers, H. J. W. Henderickx and J. G. de Vries, *Advanced Synthesis & Catalysis*, 2003, **345**, 308-323.
